# Supplementary material for: Transcriptome of Pneumocystis carinii during Fulminate Infection: Carbohydrate Metabolism and the Concept of a Compatible Parasite
Source: PLoS One. 2007 May 9;2(5):e423. doi: 10.1371/journal.pone.0000423 (PMC1855432; doi:10.1371/journal.pone.0000423)
Supplement: Table S1 — EST BLAST2GO Biological Processes-All Levels. All hierarchical levels of BLAST2GO Biological Processes for the ESTs. (0.30 MB XLS) [file pone.0000423.s004.xls]

## Sheet: ESTBioProcess. Table 1
#level	go_num	function		number hits	score
1	GO:0008150	biological_process	biological_process	1841	398.6
2	GO:0009987	cellular process	biological_process	1803	398.7
2	GO:0007582	physiological process	biological_process	1647	426.5
2	GO:0050789	regulation of biological process	biological_process	504	54.48
2	GO:0007275	development	biological_process	232	71.31
2	GO:0000003	reproduction	biological_process	126	20.18
2	GO:0040007	growth	biological_process	85	41.41
2	GO:0000004	biological process unknown	biological_process	66	66
2	GO:0007610	behavior	biological_process	31	8.331
2	GO:0016032	viral life cycle	biological_process	1	1
3	GO:0050875	cellular physiological process	biological_process	1620	501.1
3	GO:0008152	metabolism	biological_process	1484	236.7
3	GO:0050791	regulation of physiological process	biological_process	484	73.37
3	GO:0050794	regulation of cellular process	biological_process	483	71.26
3	GO:0050896	response to stimulus	biological_process	477	166.6
3	GO:0051179	localization	biological_process	384	75.11
3	GO:0007154	cell communication	biological_process	372	140.1
3	GO:0050874	organismal physiological process	biological_process	146	44.92
3	GO:0009653	morphogenesis	biological_process	116	39.01
3	GO:0048519	negative regulation of biological process	biological_process	97	9.585
3	GO:0030154	cell differentiation	biological_process	87	31.32
3	GO:0019953	sexual reproduction	biological_process	81	19.33
3	GO:0048513	organ development	biological_process	63	20.39
3	GO:0016265	death	biological_process	57	12.11
3	GO:0030447	filamentous growth	biological_process	56	50.4
3	GO:0048518	positive regulation of biological process	biological_process	54	5.12
3	GO:0050876	reproductive physiological process	biological_process	50	9.157
3	GO:0042592	homeostasis	biological_process	36	8.699
3	GO:0040029	regulation of gene expression, epigenetic	biological_process	31	12.52
3	GO:0050790	regulation of enzyme activity	biological_process	26	6.547
3	GO:0002165	larval or pupal development (sensu Insecta)	biological_process	24	4.232
3	GO:0007626	locomotory behavior	biological_process	23	8.606
3	GO:0044419	interaction between organisms	biological_process	20	4.967
3	GO:0009790	embryonic development	biological_process	19	7.944
3	GO:0006944	membrane fusion	biological_process	19	8.92
3	GO:0009791	post-embryonic development	biological_process	14	6.576
3	GO:0050793	regulation of development	biological_process	12	4.463
3	GO:0007552	metamorphosis	biological_process	12	1.112
3	GO:0040008	regulation of growth	biological_process	12	5.879
3	GO:0019954	asexual reproduction	biological_process	12	5.472
3	GO:0048367	shoot development	biological_process	10	4.166
3	GO:0007389	pattern specification	biological_process	9	2.038
3	GO:0048608	reproductive structure development	biological_process	6	1.497
3	GO:0048364	root development	biological_process	5	3.576
3	GO:0048590	non-developmental growth	biological_process	4	2.519
3	GO:0035282	segmentation	biological_process	4	0.855
3	GO:0007622	rhythmic behavior	biological_process	4	3.36
3	GO:0019098	reproductive behavior	biological_process	4	1.92
3	GO:0048511	rhythmic process	biological_process	4	2.016
3	GO:0043062	extracellular structure organization and biogenesis	biological_process	4	0.863
3	GO:0007530	sex determination	biological_process	4	1.44
3	GO:0007498	mesoderm development	biological_process	3	1.089
3	GO:0019827	stem cell maintenance	biological_process	2	1.2
3	GO:0035295	tube development	biological_process	2	0.705
3	GO:0048507	meristem development	biological_process	1	0.6
3	GO:0048589	developmental growth	biological_process	1	0.6
3	GO:0007635	chemosensory behavior	biological_process	1	0.6
4	GO:0044237	cellular metabolism	biological_process	1451	333.8
4	GO:0044238	primary metabolism	biological_process	1416	302.8
4	GO:0043170	macromolecule metabolism	biological_process	922	175.9
4	GO:0043283	biopolymer metabolism	biological_process	653	141.7
4	GO:0051244	regulation of cellular physiological process	biological_process	476	108.4
4	GO:0006950	response to stress	biological_process	429	268.8
4	GO:0016043	cell organization and biogenesis	biological_process	425	91.88
4	GO:0019222	regulation of metabolism	biological_process	416	62.19
4	GO:0009058	biosynthesis	biological_process	393	67.03
4	GO:0051234	establishment of localization	biological_process	367	103.3
4	GO:0006810	transport	biological_process	364	158.3
4	GO:0007165	signal transduction	biological_process	350	210
4	GO:0009607	response to biotic stimulus	biological_process	309	182.7
4	GO:0009605	response to external stimulus	biological_process	227	43.43
4	GO:0009056	catabolism	biological_process	223	30
4	GO:0007049	cell cycle	biological_process	221	97.16
4	GO:0008104	protein localization	biological_process	163	48.32
4	GO:0048523	negative regulation of cellular process	biological_process	94	12.25
4	GO:0043118	negative regulation of physiological process	biological_process	89	9.759
4	GO:0051301	cell division	biological_process	83	57.05
4	GO:0009719	response to endogenous stimulus	biological_process	82	26.06
4	GO:0006807	nitrogen compound metabolism	biological_process	74	12.88
4	GO:0007276	gametogenesis	biological_process	63	19.06
4	GO:0009887	organogenesis	biological_process	58	26.72
4	GO:0007059	chromosome segregation	biological_process	55	33.76
4	GO:0008219	cell death	biological_process	54	17.38
4	GO:0048610	reproductive cellular physiological process	biological_process	50	15.26
4	GO:0043119	positive regulation of physiological process	biological_process	41	5.602
4	GO:0006403	RNA localization	biological_process	37	4.57
4	GO:0048522	positive regulation of cellular process	biological_process	35	4.828
4	GO:0030435	sporulation	biological_process	33	11.87
4	GO:0019725	cell homeostasis	biological_process	31	9.591
4	GO:0050801	ion homeostasis	biological_process	30	9.979
4	GO:0048468	cell development	biological_process	30	9.385
4	GO:0006914	autophagy	biological_process	28	27.2
4	GO:0008283	cell proliferation	biological_process	26	21.75
4	GO:0016049	cell growth	biological_process	25	12.87
4	GO:0009991	response to extracellular stimulus	biological_process	25	8.635
4	GO:0040011	locomotion	biological_process	21	11.67
4	GO:0044403	symbiosis, mutualism through parasitism	biological_process	20	8.28
4	GO:0045814	negative regulation of gene expression, epigenetic	biological_process	19	11.28
4	GO:0006928	cell motility	biological_process	19	16.12
4	GO:0007568	aging	biological_process	18	6.083
4	GO:0007155	cell adhesion	biological_process	17	13.47
4	GO:0030182	neuron differentiation	biological_process	17	4.221
4	GO:0009966	regulation of signal transduction	biological_process	15	6.864
4	GO:0030448	hyphal growth	biological_process	14	14
4	GO:0043085	positive regulation of enzyme activity	biological_process	13	2.433
4	GO:0001654	eye development	biological_process	13	2.218
4	GO:0019748	secondary metabolism	biological_process	13	2.635
4	GO:0045165	cell fate commitment	biological_process	13	8.731
4	GO:0009792	embryonic development (sensu Metazoa)	biological_process	13	8.071
4	GO:0046698	metamorphosis (sensu Insecta)	biological_process	12	1.854
4	GO:0009913	epidermal cell differentiation	biological_process	12	3.24
4	GO:0051338	regulation of transferase activity	biological_process	12	3.024
4	GO:0007114	cell budding	biological_process	12	9.12
4	GO:0007517	muscle development	biological_process	11	4.035
4	GO:0016271	tissue death	biological_process	11	2.375
4	GO:0050877	neurophysiological process	biological_process	11	2.759
4	GO:0007559	histolysis	biological_process	11	3.96
4	GO:0045815	positive regulation of gene expression, epigenetic	biological_process	11	6.6
4	GO:0030471	spindle pole body and microtubule cycle (sensu Fungi)	biological_process	10	4.96
4	GO:0007124	pseudohyphal growth	biological_process	9	9
4	GO:0048534	hemopoietic or lymphoid organ development	biological_process	9	2.606
4	GO:0045926	negative regulation of growth	biological_process	8	5.199
4	GO:0051239	regulation of organismal physiological process	biological_process	8	4.355
4	GO:0009908	flower development	biological_process	8	6.8
4	GO:0042692	muscle cell differentiation	biological_process	8	0.725
4	GO:0042144	vacuole fusion, non-autophagic	biological_process	8	6.4
4	GO:0045595	regulation of cell differentiation	biological_process	8	3.48
4	GO:0009798	axis specification	biological_process	7	1.725
4	GO:0048366	leaf development	biological_process	7	1.944
4	GO:0001944	vasculature development	biological_process	7	0.682
4	GO:0048515	spermatid differentiation	biological_process	7	3.959
4	GO:0007267	cell-cell signaling	biological_process	7	1.031
4	GO:0010016	shoot morphogenesis	biological_process	7	1.944
4	GO:0001775	cell activation	biological_process	6	1.173
4	GO:0042675	cone cell differentiation	biological_process	6	2.16
4	GO:0051336	regulation of hydrolase activity	biological_process	6	2.447
4	GO:0050878	regulation of body fluids	biological_process	6	7.199
4	GO:0008015	circulation	biological_process	6	8.495
4	GO:0007588	excretion	biological_process	6	7.199
4	GO:0001402	signal transduction during filamentous growth	biological_process	5	5
4	GO:0000740	nuclear membrane fusion	biological_process	5	3
4	GO:0048598	embryonic morphogenesis	biological_process	5	1.184
4	GO:0009994	oocyte differentiation	biological_process	5	1.251
4	GO:0002009	morphogenesis of an epithelium	biological_process	5	2.788
4	GO:0051235	maintenance of localization	biological_process	5	1.799
4	GO:0031279	regulation of cyclase activity	biological_process	5	1.847
4	GO:0001410	chlamydospore formation (sensu Candida albicans)	biological_process	5	5
4	GO:0051339	regulation of lyase activity	biological_process	5	1.847
4	GO:0043086	negative regulation of enzyme activity	biological_process	4	1.065
4	GO:0030582	fruiting body formation	biological_process	4	1.295
4	GO:0035107	appendage morphogenesis	biological_process	4	0.696
4	GO:0007531	mating type determination	biological_process	4	2.4
4	GO:0008407	bristle morphogenesis	biological_process	4	4
4	GO:0006906	vesicle fusion	biological_process	4	3.2
4	GO:0030198	extracellular matrix organization and biogenesis	biological_process	4	1.44
4	GO:0009880	embryonic pattern specification	biological_process	4	0.855
4	GO:0002164	larval development	biological_process	4	2.56
4	GO:0046530	photoreceptor cell differentiation	biological_process	4	0.518
4	GO:0030098	lymphocyte differentiation	biological_process	3	2.432
4	GO:0009952	anterior/posterior pattern formation	biological_process	3	0.849
4	GO:0048646	anatomical structure formation	biological_process	3	1.209
4	GO:0042386	hemocyte differentiation (sensu Arthropoda)	biological_process	3	2.016
4	GO:0051093	negative regulation of development	biological_process	3	0.647
4	GO:0030099	myeloid cell differentiation	biological_process	3	0.791
4	GO:0035239	tube morphogenesis	biological_process	2	1.176
4	GO:0007164	establishment of tissue polarity	biological_process	2	1.152
4	GO:0007349	cellularization	biological_process	2	2
4	GO:0009755	hormone-mediated signaling	biological_process	2	0.816
4	GO:0051340	regulation of ligase activity	biological_process	2	0.259
4	GO:0048565	gut development	biological_process	2	0.677
4	GO:0009793	embryonic development (sensu Magnoliophyta)	biological_process	2	2
4	GO:0018991	oviposition	biological_process	2	2
4	GO:0030718	germ-line stem cell maintenance	biological_process	2	2
4	GO:0007617	mating behavior	biological_process	2	1.2
4	GO:0010015	root morphogenesis	biological_process	2	0.96
4	GO:0009953	dorsal/ventral pattern formation	biological_process	2	0.155
4	GO:0046849	bone remodeling	biological_process	2	0.96
4	GO:0010001	glial cell differentiation	biological_process	2	2
4	GO:0030855	epithelial cell differentiation	biological_process	2	0.96
4	GO:0048316	seed development	biological_process	2	1.2
4	GO:0048332	mesoderm morphogenesis	biological_process	2	0.816
4	GO:0048568	embryonic organ development	biological_process	2	0.646
4	GO:0009566	fertilization	biological_process	2	1.359
4	GO:0042048	olfactory behavior	biological_process	1	1
4	GO:0030216	keratinocyte differentiation	biological_process	1	1
4	GO:0000051	urea cycle intermediate metabolism	biological_process	1	0.36
4	GO:0007499	ectoderm and mesoderm interaction	biological_process	1	1
4	GO:0007623	circadian rhythm	biological_process	1	0.36
4	GO:0042593	glucose homeostasis	biological_process	1	1
4	GO:0048532	structural organization	biological_process	1	0.6
4	GO:0009875	pollen-pistil interaction	biological_process	1	1
4	GO:0006033	chitin localization	biological_process	1	1
4	GO:0018987	osmoregulation	biological_process	1	1
4	GO:0007586	digestion	biological_process	1	1
4	GO:0051094	positive regulation of development	biological_process	1	0.431
4	GO:0009933	meristem organization	biological_process	1	1
4	GO:0009845	seed germination	biological_process	1	1
4	GO:0015976	carbon utilization	biological_process	1	1
4	GO:0048569	post-embryonic organ development	biological_process	1	0.36
4	GO:0001403	invasive growth (sensu Saccharomyces)	biological_process	1	1
4	GO:0007446	imaginal disc growth	biological_process	1	1
4	GO:0045026	plasma membrane fusion	biological_process	1	0.6
4	GO:0000280	nuclear division	biological_process	1	1
4	GO:0051046	regulation of secretion	biological_process	1	0.96
4	GO:0035162	embryonic hemopoiesis	biological_process	1	1
4	GO:0001649	osteoblast differentiation	biological_process	1	1
4	GO:0009886	post-embryonic morphogenesis	biological_process	1	0.6
4	GO:0040009	regulation of growth rate	biological_process	1	0.6
4	GO:0006936	muscle contraction	biological_process	1	0.6
5	GO:0044260	cellular macromolecule metabolism	biological_process	866	250.2
5	GO:0019538	protein metabolism	biological_process	854	248.1
5	GO:0006139	nucleobase, nucleoside, nucleotide and nucleic acid metabolism	biological_process	680	180.4
5	GO:0006996	organelle organization and biogenesis	biological_process	392	111.2
5	GO:0031323	regulation of cellular metabolism	biological_process	390	87.43
5	GO:0044249	cellular biosynthesis	biological_process	352	86.51
5	GO:0006986	response to unfolded protein	biological_process	257	255.8
5	GO:0043412	biopolymer modification	biological_process	251	74.95
5	GO:0016070	RNA metabolism	biological_process	234	73.07
5	GO:0044248	cellular catabolism	biological_process	220	36.1
5	GO:0009057	macromolecule catabolism	biological_process	209	36.13
5	GO:0046907	intracellular transport	biological_process	189	73.72
5	GO:0000160	two-component signal transduction system (phosphorelay)	biological_process	183	183
5	GO:0043285	biopolymer catabolism	biological_process	167	27.58
5	GO:0006259	DNA metabolism	biological_process	154	69.47
5	GO:0045184	establishment of protein localization	biological_process	144	45.87
5	GO:0006952	defense response	biological_process	138	32.07
5	GO:0000278	mitotic cell cycle	biological_process	133	49.87
5	GO:0043207	response to external biotic stimulus	biological_process	129	28.96
5	GO:0006091	generation of precursor metabolites and energy	biological_process	122	54.63
5	GO:0007242	intracellular signaling cascade	biological_process	117	71.31
5	GO:0009611	response to wounding	biological_process	115	43.57
5	GO:0000279	M phase	biological_process	108	32.91
5	GO:0006793	phosphorus metabolism	biological_process	108	21.91
5	GO:0007028	cytoplasm organization and biogenesis	biological_process	104	29.67
5	GO:0000074	regulation of progression through cell cycle	biological_process	94	67.74
5	GO:0006629	lipid metabolism	biological_process	91	29.3
5	GO:0051243	negative regulation of cellular physiological process	biological_process	89	16.55
5	GO:0000902	cellular morphogenesis	biological_process	85	35.58
5	GO:0006082	organic acid metabolism	biological_process	85	21.62
5	GO:0005975	carbohydrate metabolism	biological_process	82	40.78
5	GO:0009628	response to abiotic stimulus	biological_process	81	25.78
5	GO:0046903	secretion	biological_process	80	34.4
5	GO:0009892	negative regulation of metabolism	biological_process	77	8.201
5	GO:0009889	regulation of biosynthesis	biological_process	76	15.09
5	GO:0051186	cofactor metabolism	biological_process	73	20.27
5	GO:0044255	cellular lipid metabolism	biological_process	73	18.84
5	GO:0016192	vesicle-mediated transport	biological_process	68	42.73
5	GO:0006974	response to DNA damage stimulus	biological_process	63	34.9
5	GO:0009308	amine metabolism	biological_process	62	16.58
5	GO:0008610	lipid biosynthesis	biological_process	61	21.9
5	GO:0006066	alcohol metabolism	biological_process	57	12.85
5	GO:0006519	amino acid and derivative metabolism	biological_process	54	14.77
5	GO:0000910	cytokinesis	biological_process	46	35.57
5	GO:0006811	ion transport	biological_process	44	8.165
5	GO:0007166	cell surface receptor linked signal transduction	biological_process	44	23.71
5	GO:0048232	male gamete generation	biological_process	42	22.42
5	GO:0015931	nucleobase, nucleoside, nucleotide and nucleic acid transport	biological_process	41	6.506
5	GO:0051325	interphase	biological_process	41	16.4
5	GO:0051236	establishment of RNA localization	biological_process	37	7.617
5	GO:0051321	meiotic cell cycle	biological_process	37	9.159
5	GO:0000819	sister chromatid segregation	biological_process	36	19.68
5	GO:0012501	programmed cell death	biological_process	34	13.5
5	GO:0048622	reproductive sporulation	biological_process	33	18.36
5	GO:0051242	positive regulation of cellular physiological process	biological_process	33	6.217
5	GO:0046483	heterocycle metabolism	biological_process	29	5.679
5	GO:0009893	positive regulation of metabolism	biological_process	26	4.325
5	GO:0006873	cell ion homeostasis	biological_process	26	11.78
5	GO:0007399	neurogenesis	biological_process	26	19.24
5	GO:0006725	aromatic compound metabolism	biological_process	25	7.253
5	GO:0042594	response to starvation	biological_process	25	8.855
5	GO:0005976	polysaccharide metabolism	biological_process	24	4.769
5	GO:0006818	hydrogen transport	biological_process	22	6.662
5	GO:0045229	external encapsulating structure organization and biogenesis	biological_process	22	10.45
5	GO:0009888	histogenesis	biological_process	21	5.049
5	GO:0009267	cellular response to starvation	biological_process	21	12.6
5	GO:0000904	cellular morphogenesis during differentiation	biological_process	20	6.495
5	GO:0044404	symbiotic interaction between host and other organism	biological_process	20	13.8
5	GO:0006800	oxygen and reactive oxygen species metabolism	biological_process	19	10.24
5	GO:0000746	conjugation	biological_process	18	7.078
5	GO:0007292	female gamete generation	biological_process	18	6.007
5	GO:0048666	neuron development	biological_process	15	3.836
5	GO:0006790	sulfur metabolism	biological_process	15	7.284
5	GO:0009408	response to heat	biological_process	15	15
5	GO:0007062	sister chromatid cohesion	biological_process	15	14.2
5	GO:0007444	imaginal disc development	biological_process	14	3.454
5	GO:0009581	detection of external stimulus	biological_process	14	3.542
5	GO:0007569	cell aging	biological_process	14	5.471
5	GO:0048592	eye morphogenesis	biological_process	13	3.697
5	GO:0009826	unidimensional cell growth	biological_process	12	9.6
5	GO:0045859	regulation of protein kinase activity	biological_process	12	5.039
5	GO:0009725	response to hormone stimulus	biological_process	11	5.649
5	GO:0035070	salivary gland histolysis	biological_process	11	6.6
5	GO:0001558	regulation of cell growth	biological_process	11	8.2
5	GO:0016044	membrane organization and biogenesis	biological_process	11	5.383
5	GO:0000067	DNA replication and chromosome cycle	biological_process	10	10
5	GO:0035315	hair cell differentiation	biological_process	10	3.801
5	GO:0051128	regulation of cell organization and biogenesis	biological_process	10	3.552
5	GO:0009894	regulation of catabolism	biological_process	10	5.232
5	GO:0006885	regulation of pH	biological_process	9	5.08
5	GO:0030097	hemopoiesis	biological_process	9	4.103
5	GO:0042440	pigment metabolism	biological_process	9	3.096
5	GO:0006766	vitamin metabolism	biological_process	8	1.047
5	GO:0051049	regulation of transport	biological_process	8	5.28
5	GO:0007519	myogenesis	biological_process	8	0.725
5	GO:0048627	myoblast development	biological_process	8	2.015
5	GO:0045445	myoblast differentiation	biological_process	8	1.209
5	GO:0048469	cell maturation	biological_process	8	2.015
5	GO:0001700	embryonic development (sensu Insecta)	biological_process	7	6.296
5	GO:0043094	metabolic compound salvage	biological_process	7	2.376
5	GO:0045132	meiotic chromosome segregation	biological_process	7	4.2
5	GO:0001568	blood vessel development	biological_process	7	1.137
5	GO:0009751	response to salicylic acid stimulus	biological_process	7	2.52
5	GO:0042330	taxis	biological_process	7	4.56
5	GO:0007286	spermatid development	biological_process	7	6.6
5	GO:0009965	leaf morphogenesis	biological_process	7	3.239
5	GO:0043114	regulation of vascular permeability	biological_process	6	6
5	GO:0019740	nitrogen utilization	biological_process	6	3.599
5	GO:0043284	biopolymer biosynthesis	biological_process	6	1.483
5	GO:0046209	nitric oxide metabolism	biological_process	6	1.295
5	GO:0045321	immune cell activation	biological_process	6	1.955
5	GO:0050880	regulation of blood vessel size	biological_process	6	2.16
5	GO:0007369	gastrulation	biological_process	6	4.289
5	GO:0007589	fluid secretion	biological_process	6	6
5	GO:0006809	nitric oxide biosynthesis	biological_process	6	2.16
5	GO:0006869	lipid transport	biological_process	6	3.76
5	GO:0016477	cell migration	biological_process	6	5.88
5	GO:0008217	regulation of blood pressure	biological_process	6	6
5	GO:0042312	regulation of vasodilation	biological_process	6	6
5	GO:0042676	cone cell fate commitment	biological_process	6	3.599
5	GO:0001709	cell fate determination	biological_process	6	4.72
5	GO:0051171	regulation of nitrogen metabolism	biological_process	6	3.599
5	GO:0042244	spore wall assembly	biological_process	6	3.599
5	GO:0030146	diuresis	biological_process	6	6
5	GO:0030147	natriuresis	biological_process	6	6
5	GO:0030474	spindle pole body duplication	biological_process	6	3.599
5	GO:0019226	transmission of nerve impulse	biological_process	5	0.999
5	GO:0045185	maintenance of protein localization	biological_process	5	3
5	GO:0051347	positive regulation of transferase activity	biological_process	5	1.464
5	GO:0001708	cell fate specification	biological_process	5	4.2
5	GO:0016337	cell-cell adhesion	biological_process	5	3.32
5	GO:0015849	organic acid transport	biological_process	5	1.195
5	GO:0042127	regulation of cell proliferation	biological_process	5	4.6
5	GO:0045454	cell redox homeostasis	biological_process	5	4.2
5	GO:0006081	aldehyde metabolism	biological_process	5	1.799
5	GO:0007281	germ cell development	biological_process	5	0.531
5	GO:0042145	homotypic vacuole fusion, non-autophagic	biological_process	4	4
5	GO:0007309	oocyte axis determination	biological_process	4	1.459
5	GO:0050808	synapse organization and biogenesis	biological_process	4	2.4
5	GO:0009968	negative regulation of signal transduction	biological_process	4	3.4
5	GO:0007117	budding cell bud growth	biological_process	4	4.2
5	GO:0051056	regulation of small GTPase mediated signal transduction	biological_process	4	1.44
5	GO:0016331	morphogenesis of embryonic epithelium	biological_process	4	1.896
5	GO:0051348	negative regulation of transferase activity	biological_process	4	1.776
5	GO:0006518	peptide metabolism	biological_process	4	3.36
5	GO:0035114	appendage morphogenesis (sensu Endopterygota)	biological_process	4	1.161
5	GO:0043449	alkene metabolism	biological_process	4	0.466
5	GO:0007350	blastoderm segmentation	biological_process	4	1.425
5	GO:0030587	fruiting body formation (sensu Dictyosteliida)	biological_process	4	2.16
5	GO:0007467	photoreceptor cell differentiation (sensu Endopterygota)	biological_process	4	0.863
5	GO:0031281	positive regulation of cyclase activity	biological_process	3	1.08
5	GO:0043087	regulation of GTPase activity	biological_process	3	3
5	GO:0043281	regulation of caspase activity	biological_process	3	1.08
5	GO:0007405	neuroblast proliferation	biological_process	3	3
5	GO:0045610	regulation of hemocyte differentiation	biological_process	3	2.36
5	GO:0009948	anterior/posterior axis specification	biological_process	3	1.416
5	GO:0051345	positive regulation of hydrolase activity	biological_process	3	1.08
5	GO:0001704	formation of primary germ layer	biological_process	3	2.016
5	GO:0045596	negative regulation of cell differentiation	biological_process	3	1.08
5	GO:0006730	one-carbon compound metabolism	biological_process	3	1.08
5	GO:0009909	regulation of flower development	biological_process	3	3
5	GO:0000578	embryonic axis specification	biological_process	3	1.416
5	GO:0016042	lipid catabolism	biological_process	3	3
5	GO:0009612	response to mechanical stimulus	biological_process	3	3
5	GO:0015837	amine transport	biological_process	3	2.16
5	GO:0007507	heart development	biological_process	3	3
5	GO:0051349	positive regulation of lyase activity	biological_process	3	1.08
5	GO:0008340	determination of adult life span	biological_process	3	3
5	GO:0000128	flocculation	biological_process	3	2.2
5	GO:0042180	ketone metabolism	biological_process	2	1.2
5	GO:0007532	regulation of transcription, mating-type specific	biological_process	2	2
5	GO:0051438	regulation of ubiquitin ligase activity	biological_process	2	0.431
5	GO:0051351	positive regulation of ligase activity	biological_process	2	0.431
5	GO:0016237	microautophagy	biological_process	2	2
5	GO:0045637	regulation of myeloid cell differentiation	biological_process	2	0.72
5	GO:0001736	establishment of planar polarity	biological_process	2	1.92
5	GO:0001738	morphogenesis of a polarized epithelium	biological_process	2	1.152
5	GO:0006662	glycerol ether metabolism	biological_process	2	0.431
5	GO:0030218	erythrocyte differentiation	biological_process	2	0.72
5	GO:0048663	neuron fate commitment	biological_process	2	1.2
5	GO:0046879	hormone secretion	biological_process	2	0.72
5	GO:0046552	photoreceptor cell fate commitment	biological_process	2	0.431
5	GO:0046651	lymphocyte proliferation	biological_process	2	2
5	GO:0009950	dorsal/ventral axis specification	biological_process	2	0.259
5	GO:0009740	gibberellic acid mediated signaling	biological_process	2	1.359
5	GO:0010053	root epidermal cell differentiation	biological_process	2	1.6
5	GO:0007619	courtship behavior	biological_process	2	2
5	GO:0043009	embryonic development (sensu Vertebrata)	biological_process	2	1.2
5	GO:0001655	urogenital system development	biological_process	2	2
5	GO:0009914	hormone transport	biological_process	2	1.2
5	GO:0046950	ketone body metabolism	biological_process	2	1.2
5	GO:0001501	skeletal development	biological_process	2	1.359
5	GO:0007424	tracheal system development (sensu Insecta)	biological_process	2	1.56
5	GO:0007533	mating type switching	biological_process	2	2
5	GO:0002168	larval development (sensu Insecta)	biological_process	2	1.6
5	GO:0045664	regulation of neuron differentiation	biological_process	2	2
5	GO:0008356	asymmetric cell division	biological_process	2	2
5	GO:0035026	leading edge cell differentiation	biological_process	2	1.6
5	GO:0015669	gas transport	biological_process	2	1.2
5	GO:0009743	response to carbohydrate stimulus	biological_process	1	0.36
5	GO:0030588	pseudocleavage	biological_process	1	0.6
5	GO:0008589	regulation of smoothened signaling pathway	biological_process	1	0.6
5	GO:0030111	regulation of Wnt receptor signaling pathway	biological_process	1	0.6
5	GO:0016203	muscle attachment	biological_process	1	1
5	GO:0001555	oocyte growth	biological_process	1	1
5	GO:0006937	regulation of muscle contraction	biological_process	1	1
5	GO:0048512	circadian behavior	biological_process	1	0.6
5	GO:0009726	detection of endogenous stimulus	biological_process	1	0.36
5	GO:0046887	positive regulation of hormone secretion	biological_process	1	1
5	GO:0048562	embryonic organogenesis	biological_process	1	0.077
5	GO:0048566	embryonic gut development	biological_process	1	0.129
5	GO:0035272	exocrine system development	biological_process	1	0.36
5	GO:0035148	lumen formation	biological_process	1	0.6
5	GO:0045967	negative regulation of growth rate	biological_process	1	1
5	GO:0030224	monocyte differentiation	biological_process	1	0.6
5	GO:0007379	segment specification	biological_process	1	0.36
5	GO:0001539	ciliary or flagellar motility	biological_process	1	1
5	GO:0050865	regulation of cell activation	biological_process	1	0.259
5	GO:0015833	peptide transport	biological_process	1	0.6
5	GO:0009640	photomorphogenesis	biological_process	1	1
5	GO:0009606	tropism	biological_process	1	0.6
5	GO:0043010	eye development (sensu Vertebrata)	biological_process	1	0.6
5	GO:0009967	positive regulation of signal transduction	biological_process	1	0.6
5	GO:0017015	regulation of transforming growth factor beta receptor signaling pathway	biological_process	1	0.6
5	GO:0009825	multidimensional cell growth	biological_process	1	1
5	GO:0017183	peptidyl-diphthamide biosynthesis from peptidyl-histidine	biological_process	1	1
5	GO:0007516	hemocyte development	biological_process	1	1
5	GO:0007503	fat body development	biological_process	1	1
5	GO:0007098	centrosome cycle	biological_process	1	0.129
5	GO:0042688	crystal cell differentiation	biological_process	1	0.36
5	GO:0042710	biofilm formation	biological_process	1	1
5	GO:0007338	fertilization (sensu Metazoa)	biological_process	1	0.6
5	GO:0045619	regulation of lymphocyte differentiation	biological_process	1	0.72
5	GO:0007494	midgut development	biological_process	1	1
5	GO:0030217	T cell differentiation	biological_process	1	0.36
5	GO:0001763	branching morphogenesis	biological_process	1	0.36
5	GO:0048542	lymph gland development (sensu Arthropoda)	biological_process	1	0.6
5	GO:0051047	positive regulation of secretion	biological_process	1	0.6
5	GO:0035167	lymph gland hemopoiesis (sensu Arthropoda)	biological_process	1	1
5	GO:0046938	phytochelatin biosynthesis	biological_process	1	1
5	GO:0008643	carbohydrate transport	biological_process	1	0.6
5	GO:0045453	bone resorption	biological_process	1	1
5	GO:0045597	positive regulation of cell differentiation	biological_process	1	0.72
5	GO:0031155	regulation of fruiting body formation	biological_process	1	0.36
5	GO:0007439	ectodermal gut development	biological_process	1	0.129
5	GO:0001710	mesodermal cell fate commitment	biological_process	1	1
5	GO:0048546	digestive tract morphogenesis	biological_process	1	0.077
5	GO:0051240	positive regulation of organismal physiological process	biological_process	1	0.259
6	GO:0044267	cellular protein metabolism	biological_process	851	407.1
6	GO:0006350	transcription	biological_process	367	139.3
6	GO:0019219	regulation of nucleobase, nucleoside, nucleotide and nucleic acid metabolism	biological_process	353	123.1
6	GO:0009059	macromolecule biosynthesis	biological_process	245	85.49
6	GO:0006464	protein modification	biological_process	202	104.6
6	GO:0044265	cellular macromolecule catabolism	biological_process	197	46.25
6	GO:0006396	RNA processing	biological_process	191	89.03
6	GO:0030163	protein catabolism	biological_process	161	44.18
6	GO:0016071	mRNA metabolism	biological_process	144	53.6
6	GO:0015031	protein transport	biological_process	142	70.86
6	GO:0009613	response to pest, pathogen or parasite	biological_process	129	48.19
6	GO:0006955	immune response	biological_process	123	46.25
6	GO:0051276	chromosome organization and biogenesis	biological_process	119	32.45
6	GO:0007010	cytoskeleton organization and biogenesis	biological_process	118	48.58
6	GO:0006886	intracellular protein transport	biological_process	112	62.34
6	GO:0006796	phosphate metabolism	biological_process	108	36.51
6	GO:0042254	ribosome biogenesis and assembly	biological_process	103	48.46
6	GO:0006323	DNA packaging	biological_process	96	25.72
6	GO:0000087	M phase of mitotic cell cycle	biological_process	86	39.58
6	GO:0019752	carboxylic acid metabolism	biological_process	85	36.03
6	GO:0051246	regulation of protein metabolism	biological_process	78	23.42
6	GO:0031324	negative regulation of cellular metabolism	biological_process	73	12.7
6	GO:0045045	secretory pathway	biological_process	73	44.41
6	GO:0031326	regulation of cellular biosynthesis	biological_process	69	21.19
6	GO:0044262	cellular carbohydrate metabolism	biological_process	68	30.63
6	GO:0009117	nucleotide metabolism	biological_process	63	8.157
6	GO:0015980	energy derivation by oxidation of organic compounds	biological_process	61	31.34
6	GO:0006732	coenzyme metabolism	biological_process	58	20.69
6	GO:0006913	nucleocytoplasmic transport	biological_process	56	17.83
6	GO:0051169	nuclear transport	biological_process	55	16.68
6	GO:0006118	electron transport	biological_process	54	50.86
6	GO:0006520	amino acid metabolism	biological_process	51	21.37
6	GO:0016072	rRNA metabolism	biological_process	49	28.79
6	GO:0007264	small GTPase mediated signal transduction	biological_process	48	38.06
6	GO:0006281	DNA repair	biological_process	48	42.76
6	GO:0009165	nucleotide biosynthesis	biological_process	46	8.518
6	GO:0007283	spermatogenesis	biological_process	42	37.37
6	GO:0006260	DNA replication	biological_process	41	26.5
6	GO:0051329	interphase of mitotic cell cycle	biological_process	41	27.33
6	GO:0006399	tRNA metabolism	biological_process	40	19
6	GO:0009451	RNA modification	biological_process	40	14.44
6	GO:0042221	response to chemical substance	biological_process	39	15.44
6	GO:0016052	carbohydrate catabolism	biological_process	39	13.45
6	GO:0050658	RNA transport	biological_process	37	12.69
6	GO:0050657	nucleic acid transport	biological_process	37	7.617
6	GO:0051327	M phase of meiotic cell cycle	biological_process	36	14.26
6	GO:0007163	establishment and/or maintenance of cell polarity	biological_process	36	17.46
6	GO:0008361	regulation of cell size	biological_process	35	18.59
6	GO:0006812	cation transport	biological_process	34	9.792
6	GO:0030437	sporulation (sensu Fungi)	biological_process	33	30.6
6	GO:0051188	cofactor biosynthesis	biological_process	33	8.726
6	GO:0051187	cofactor catabolism	biological_process	29	6.263
6	GO:0005996	monosaccharide metabolism	biological_process	27	5.1
6	GO:0007005	mitochondrion organization and biogenesis	biological_process	26	17.22
6	GO:0046034	ATP metabolism	biological_process	26	11.1
6	GO:0048193	Golgi vesicle transport	biological_process	25	14.73
6	GO:0044271	nitrogen compound biosynthesis	biological_process	25	7.862
6	GO:0009309	amine biosynthesis	biological_process	25	13.1
6	GO:0006997	nuclear organization and biogenesis	biological_process	24	11.99
6	GO:0007243	protein kinase cascade	biological_process	23	11.28
6	GO:0006897	endocytosis	biological_process	23	20.6
6	GO:0007047	cell wall organization and biogenesis	biological_process	22	17.42
6	GO:0015992	proton transport	biological_process	22	11.1
6	GO:0046164	alcohol catabolism	biological_process	22	3.041
6	GO:0008202	steroid metabolism	biological_process	21	7.007
6	GO:0006694	steroid biosynthesis	biological_process	21	11.07
6	GO:0006643	membrane lipid metabolism	biological_process	21	5.118
6	GO:0006119	oxidative phosphorylation	biological_process	21	9.704
6	GO:0016125	sterol metabolism	biological_process	21	10.68
6	GO:0051320	S phase	biological_process	20	12
6	GO:0000075	cell cycle checkpoint	biological_process	20	8.289
6	GO:0007186	G-protein coupled receptor protein signaling pathway	biological_process	20	13.18
6	GO:0030705	cytoskeleton-dependent intracellular transport	biological_process	20	11.23
6	GO:0031325	positive regulation of cellular metabolism	biological_process	19	3.009
6	GO:0016458	gene silencing	biological_process	19	11.28
6	GO:0007346	regulation of progression through mitotic cell cycle	biological_process	19	16.2
6	GO:0009405	pathogenesis	biological_process	19	19
6	GO:0006979	response to oxidative stress	biological_process	18	16.08
6	GO:0009112	nucleobase metabolism	biological_process	18	5.016
6	GO:0000747	conjugation with cellular fusion	biological_process	18	11.79
6	GO:0006915	apoptosis	biological_process	17	9.24
6	GO:0006575	amino acid derivative metabolism	biological_process	17	3.231
6	GO:0019932	second-messenger-mediated signaling	biological_process	17	6.111
6	GO:0048477	oogenesis	biological_process	17	8.345
6	GO:0016053	organic acid biosynthesis	biological_process	17	5.831
6	GO:0006576	biogenic amine metabolism	biological_process	17	5.025
6	GO:0007398	ectoderm development	biological_process	17	5.766
6	GO:0009116	nucleoside metabolism	biological_process	17	2.721
6	GO:0030003	cation homeostasis	biological_process	16	5.588
6	GO:0046112	nucleobase biosynthesis	biological_process	16	5.76
6	GO:0006970	response to osmotic stress	biological_process	16	12.11
6	GO:0043414	biopolymer methylation	biological_process	16	6.72
6	GO:0048667	neuron morphogensis during differentiation	biological_process	15	6.393
6	GO:0042149	cellular response to glucose starvation	biological_process	15	15
6	GO:0009266	response to temperature	biological_process	15	9
6	GO:0046467	membrane lipid biosynthesis	biological_process	15	4.067
6	GO:0042829	defense response to pathogen	biological_process	14	5.311
6	GO:0048308	organelle inheritance	biological_process	14	8.399
6	GO:0043413	biopolymer glycosylation	biological_process	14	4.204
6	GO:0006839	mitochondrial transport	biological_process	14	13.2
6	GO:0006310	DNA recombination	biological_process	14	12.04
6	GO:0000917	barrier septum formation	biological_process	12	9.6
6	GO:0009617	response to bacteria	biological_process	12	5.856
6	GO:0001302	replicative cell aging	biological_process	12	8.399
6	GO:0007452	imaginal disc metamorphosis	biological_process	12	2.491
6	GO:0031098	stress-activated protein kinase signaling pathway	biological_process	12	9.616
6	GO:0042770	DNA damage response, signal transduction	biological_process	12	7.415
6	GO:0007456	eye morphogenesis (sensu Endopterygota)	biological_process	12	4.99
6	GO:0007167	enzyme linked receptor protein signaling pathway	biological_process	11	3.153
6	GO:0007571	age-dependent general metabolic decline	biological_process	11	6.119
6	GO:0007032	endosome organization and biogenesis	biological_process	11	5.96
6	GO:0009314	response to radiation	biological_process	11	4.483
6	GO:0051052	regulation of DNA metabolism	biological_process	11	6.24
6	GO:0006820	anion transport	biological_process	11	3.816
6	GO:0048102	autophagic cell death	biological_process	11	6.6
6	GO:0007033	vacuole organization and biogenesis	biological_process	11	7.071
6	GO:0007034	vacuolar transport	biological_process	11	6.92
6	GO:0035214	eye-antennal disc development	biological_process	10	1.794
6	GO:0009166	nucleotide catabolism	biological_process	10	1.295
6	GO:0007422	peripheral nervous system development	biological_process	10	6.64
6	GO:0046148	pigment biosynthesis	biological_process	9	5.16
6	GO:0007105	cytokinesis, site selection	biological_process	9	4.96
6	GO:0042168	heme metabolism	biological_process	9	5.16
6	GO:0019438	aromatic compound biosynthesis	biological_process	9	2.376
6	GO:0006778	porphyrin metabolism	biological_process	9	3.096
6	GO:0007031	peroxisome organization and biogenesis	biological_process	9	9
6	GO:0000920	cell separation during cytokinesis	biological_process	8	8
6	GO:0051318	G1 phase	biological_process	8	3.36
6	GO:0007417	central nervous system development	biological_process	8	4.48
6	GO:0009582	detection of abiotic stimulus	biological_process	8	2.304
6	GO:0043067	regulation of programmed cell death	biological_process	8	1.56
6	GO:0048628	myoblast maturation	biological_process	8	3.36
6	GO:0006767	water-soluble vitamin metabolism	biological_process	8	1.745
6	GO:0009863	salicylic acid mediated signaling pathway	biological_process	7	4.2
6	GO:0008360	regulation of cell shape	biological_process	7	7
6	GO:0010026	trichome differentiation (sensu Magnoliophyta)	biological_process	7	5.4
6	GO:0045787	positive regulation of progression through cell cycle	biological_process	7	4.2
6	GO:0048284	organelle fusion	biological_process	7	4.032
6	GO:0043101	purine salvage	biological_process	7	3.959
6	GO:0048514	blood vessel morphogenesis	biological_process	7	1.896
6	GO:0042430	indole and derivative metabolism	biological_process	7	0.993
6	GO:0031023	microtubule organizing center organization and biogenesis	biological_process	7	1.373
6	GO:0043174	nucleoside salvage	biological_process	7	3.959
6	GO:0019751	polyol metabolism	biological_process	7	3.24
6	GO:0051248	negative regulation of protein metabolism	biological_process	6	2.16
6	GO:0007103	spindle pole body duplication in nuclear envelope	biological_process	6	6
6	GO:0042815	bipolar cell growth	biological_process	6	6
6	GO:0009306	protein secretion	biological_process	6	5.6
6	GO:0042311	vasodilation	biological_process	6	3.599
6	GO:0051322	anaphase	biological_process	6	3.119
6	GO:0009163	nucleoside biosynthesis	biological_process	6	1.295
6	GO:0030476	spore wall assembly (sensu Fungi)	biological_process	6	6
6	GO:0006720	isoprenoid metabolism	biological_process	6	1.666
6	GO:0045428	regulation of nitric oxide biosynthesis	biological_process	6	3.599
6	GO:0009891	positive regulation of biosynthesis	biological_process	6	3.599
6	GO:0007600	sensory perception	biological_process	6	3.599
6	GO:0007219	Notch signaling pathway	biological_process	6	6
6	GO:0030258	lipid modification	biological_process	6	3.12
6	GO:0000916	cytokinesis, contractile ring contraction	biological_process	6	3.599
6	GO:0009733	response to auxin stimulus	biological_process	6	6
6	GO:0000271	polysaccharide biosynthesis	biological_process	6	2.472
6	GO:0046649	lymphocyte activation	biological_process	6	3.259
6	GO:0000272	polysaccharide catabolism	biological_process	6	1.785
6	GO:0042435	indole derivative biosynthesis	biological_process	6	2.16
6	GO:0006808	regulation of nitrogen utilization	biological_process	6	6
6	GO:0016036	cellular response to phosphate starvation	biological_process	5	5
6	GO:0044272	sulfur compound biosynthesis	biological_process	5	2.208
6	GO:0009110	vitamin biosynthesis	biological_process	5	1.512
6	GO:0048599	oocyte development	biological_process	5	0.885
6	GO:0007268	synaptic transmission	biological_process	5	1.665
6	GO:0043405	regulation of MAPK activity	biological_process	5	1.799
6	GO:0043068	positive regulation of programmed cell death	biological_process	5	1.521
6	GO:0006304	DNA modification	biological_process	5	2.68
6	GO:0030030	cell projection organization and biogenesis	biological_process	5	2.553
6	GO:0045053	protein retention in Golgi	biological_process	5	5
6	GO:0046942	carboxylic acid transport	biological_process	5	1.991
6	GO:0045860	positive regulation of protein kinase activity	biological_process	5	2.44
6	GO:0046165	alcohol biosynthesis	biological_process	5	1.627
6	GO:0045786	negative regulation of progression through cell cycle	biological_process	5	3.16
6	GO:0031163	metallo-sulfur cluster assembly	biological_process	5	3
6	GO:0045851	pH reduction	biological_process	5	1.799
6	GO:0006040	amino sugar metabolism	biological_process	5	0.734
6	GO:0006109	regulation of carbohydrate metabolism	biological_process	5	4.36
6	GO:0006998	nuclear membrane organization and biogenesis	biological_process	4	3.6
6	GO:0051129	negative regulation of cell organization and biogenesis	biological_process	4	2.639
6	GO:0001754	eye photoreceptor cell differentiation	biological_process	4	0.863
6	GO:0015914	phospholipid transport	biological_process	4	3.6
6	GO:0009595	detection of biotic stimulus	biological_process	4	1.44
6	GO:0006469	negative regulation of protein kinase activity	biological_process	4	2.96
6	GO:0010090	trichome morphogenesis (sensu Magnoliophyta)	biological_process	4	4
6	GO:0007391	dorsal closure	biological_process	4	3.159
6	GO:0042063	gliogenesis	biological_process	4	2.4
6	GO:0035220	wing disc development	biological_process	4	0.696
6	GO:0042214	terpene metabolism	biological_process	4	0.777
6	GO:0006984	ER-nuclear signaling pathway	biological_process	4	2.8
6	GO:0007006	mitochondrial membrane organization and biogenesis	biological_process	4	1.44
6	GO:0043450	alkene biosynthesis	biological_process	4	0.777
6	GO:0051058	negative regulation of small GTPase mediated signal transduction	biological_process	4	2.4
6	GO:0007476	wing morphogenesis	biological_process	4	1.936
6	GO:0044270	nitrogen compound catabolism	biological_process	3	0.336
6	GO:0007416	synaptogenesis	biological_process	3	3
6	GO:0009225	nucleotide-sugar metabolism	biological_process	3	1.319
6	GO:0016339	calcium-dependent cell-cell adhesion	biological_process	3	2.2
6	GO:0043280	positive regulation of caspase activity	biological_process	3	1.799
6	GO:0031152	aggregation during fruiting body formation	biological_process	3	2.6
6	GO:0000767	cellular morphogenesis during conjugation	biological_process	3	1.329
6	GO:0006265	DNA topological change	biological_process	3	3
6	GO:0046292	formaldehyde metabolism	biological_process	3	1.799
6	GO:0008354	germ cell migration	biological_process	3	3
6	GO:0006670	sphingosine metabolism	biological_process	3	1.799
6	GO:0048278	vesicle docking	biological_process	3	2.2
6	GO:0007351	regional subdivision	biological_process	3	1.416
6	GO:0006865	amino acid transport	biological_process	3	2.6
6	GO:0043069	negative regulation of programmed cell death	biological_process	3	1.08
6	GO:0009310	amine catabolism	biological_process	3	0.561
6	GO:0006862	nucleotide transport	biological_process	3	1.56
6	GO:0046185	aldehyde catabolism	biological_process	3	1.799
6	GO:0045762	positive regulation of adenylate cyclase activity	biological_process	3	1.799
6	GO:0007229	integrin-mediated signaling pathway	biological_process	3	3
6	GO:0042769	DNA damage response, perception of DNA damage	biological_process	3	3
6	GO:0008595	determination of anterior/posterior axis, embryo	biological_process	3	2.36
6	GO:0007400	neuroblast fate determination	biological_process	3	3
6	GO:0009926	auxin polar transport	biological_process	2	2
6	GO:0001701	embryonic development (sensu Mammalia)	biological_process	2	2
6	GO:0046460	neutral lipid biosynthesis	biological_process	2	0.72
6	GO:0006639	acylglycerol metabolism	biological_process	2	0.72
6	GO:0051247	positive regulation of protein metabolism	biological_process	2	1.2
6	GO:0051439	regulation of ubiquitin ligase activity during mitotic cell cycle	biological_process	2	0.72
6	GO:0010017	red or far red light signaling pathway	biological_process	2	1.2
6	GO:0031338	regulation of vesicle fusion	biological_process	2	2
6	GO:0051050	positive regulation of transport	biological_process	2	1.2
6	GO:0001737	establishment of wing hair orientation	biological_process	2	1.6
6	GO:0042558	pteridine and derivative metabolism	biological_process	2	0.72
6	GO:0042461	photoreceptor cell development	biological_process	2	0.431
6	GO:0007402	ganglion mother cell fate determination	biological_process	2	2
6	GO:0016998	cell wall catabolism	biological_process	2	2
6	GO:0007459	photoreceptor fate commitment (sensu Endopterygota)	biological_process	2	0.72
6	GO:0046504	glycerol ether biosynthesis	biological_process	2	0.72
6	GO:0009739	response to gibberellic acid stimulus	biological_process	2	0.816
6	GO:0009785	blue light signaling pathway	biological_process	2	2
6	GO:0046951	ketone body biosynthesis	biological_process	2	2
6	GO:0007492	endoderm development	biological_process	2	1.2
6	GO:0006638	neutral lipid metabolism	biological_process	2	0.431
6	GO:0008103	oocyte microtubule cytoskeleton polarization	biological_process	2	2
6	GO:0051443	positive regulation of ubiquitin ligase activity	biological_process	2	0.72
6	GO:0007157	heterophilic cell adhesion	biological_process	2	1.2
6	GO:0019915	lipid storage	biological_process	2	2
6	GO:0045638	negative regulation of myeloid cell differentiation	biological_process	2	1.2
6	GO:0045478	fusome organization and biogenesis	biological_process	2	2
6	GO:0009735	response to cytokinin stimulus	biological_process	2	2
6	GO:0030716	oocyte fate determination	biological_process	2	1.2
6	GO:0009226	nucleotide-sugar biosynthesis	biological_process	2	1.2
6	GO:0046486	glycerolipid metabolism	biological_process	2	0.431
6	GO:0008347	glial cell migration	biological_process	2	2
6	GO:0042060	wound healing	biological_process	2	2
6	GO:0007030	Golgi organization and biogenesis	biological_process	2	2
6	GO:0044409	entry into host	biological_process	2	2
6	GO:0045646	regulation of erythrocyte differentiation	biological_process	2	1.2
6	GO:0030002	anion homeostasis	biological_process	2	0.72
6	GO:0015671	oxygen transport	biological_process	2	2
6	GO:0001707	mesoderm formation	biological_process	2	1.359
6	GO:0048111	oocyte axis determination (sensu Insecta)	biological_process	2	0.431
6	GO:0007041	lysosomal transport	biological_process	2	1.2
6	GO:0001703	gastrulation (sensu Protostomia)	biological_process	2	1.799
6	GO:0030503	regulation of cell redox homeostasis	biological_process	2	2
6	GO:0007231	osmosensory signaling pathway	biological_process	2	1.2
6	GO:0007310	oocyte dorsal/ventral axis determination	biological_process	2	0.431
6	GO:0001300	chronological cell aging	biological_process	2	0.72
6	GO:0009895	negative regulation of catabolism	biological_process	2	0.72
6	GO:0016055	Wnt receptor signaling pathway	biological_process	2	0.96
6	GO:0042375	quinone cofactor metabolism	biological_process	1	0.36
6	GO:0015908	fatty acid transport	biological_process	1	1
6	GO:0010054	trichoblast differentiation	biological_process	1	1
6	GO:0048489	synaptic vesicle transport	biological_process	1	0.36
6	GO:0045580	regulation of T cell differentiation	biological_process	1	0.6
6	GO:0046883	regulation of hormone secretion	biological_process	1	0.6
6	GO:0046605	regulation of centrosome cycle	biological_process	1	0.36
6	GO:0042742	defense response to bacteria	biological_process	1	0.36
6	GO:0048593	eye morphogenesis (sensu Vertebrata)	biological_process	1	1
6	GO:0035146	tube fusion	biological_process	1	0.6
6	GO:0051299	centrosome separation	biological_process	1	0.215
6	GO:0007365	periodic partitioning	biological_process	1	0.6
6	GO:0035166	post-embryonic hemopoiesis	biological_process	1	0.6
6	GO:0050778	positive regulation of immune response	biological_process	1	0.431
6	GO:0006801	superoxide metabolism	biological_process	1	1
6	GO:0006791	sulfur utilization	biological_process	1	0.6
6	GO:0051445	regulation of progression through meiotic cell cycle	biological_process	1	1
6	GO:0044416	induction of host defense response	biological_process	1	1
6	GO:0044406	adhesion to host	biological_process	1	1
6	GO:0007390	germ-band shortening	biological_process	1	1
6	GO:0035147	tracheal branch fusion	biological_process	1	1
6	GO:0048567	ectodermal gut morphogenesis	biological_process	1	0.215
6	GO:0046458	hexadecanal metabolism	biological_process	1	0.6
6	GO:0050767	regulation of neurogenesis	biological_process	1	0.6
6	GO:0045879	negative regulation of smoothened signaling pathway	biological_process	1	1
6	GO:0009957	epidermal cell fate specification	biological_process	1	1
6	GO:0051174	regulation of phosphorus metabolism	biological_process	1	0.215
6	GO:0048547	gut morphogenesis	biological_process	1	0.129
6	GO:0031154	culmination during fruiting body formation	biological_process	1	1
6	GO:0046487	glyoxylate metabolism	biological_process	1	0.6
6	GO:0009720	detection of hormone stimulus	biological_process	1	0.6
6	GO:0030512	negative regulation of transforming growth factor beta receptor signaling pathway	biological_process	1	1
6	GO:0050867	positive regulation of cell activation	biological_process	1	0.431
6	GO:0007291	sperm individualization	biological_process	1	1
6	GO:0045611	negative regulation of hemocyte differentiation	biological_process	1	0.6
6	GO:0009746	response to hexose stimulus	biological_process	1	0.6
6	GO:0016074	snoRNA metabolism	biological_process	1	1
6	GO:0009937	regulation of gibberellic acid mediated signaling	biological_process	1	0.6
6	GO:0046717	acid secretion	biological_process	1	0.6
6	GO:0006995	cellular response to nitrogen starvation	biological_process	1	1
6	GO:0035149	tracheal lumen formation	biological_process	1	1
6	GO:0048665	neuron fate specification	biological_process	1	1
6	GO:0031106	septin ring organization	biological_process	1	0.6
6	GO:0006857	oligopeptide transport	biological_process	1	1
6	GO:0030072	peptide hormone secretion	biological_process	1	0.6
6	GO:0007431	salivary gland development	biological_process	1	0.6
6	GO:0015949	nucleobase, nucleoside and nucleotide interconversion	biological_process	1	1
6	GO:0000911	cytokinesis by cell plate formation	biological_process	1	1
6	GO:0007297	follicle cell migration (sensu Insecta)	biological_process	1	0.6
6	GO:0007009	plasma membrane organization and biogenesis	biological_process	1	0.6
6	GO:0009401	phosphoenolpyruvate-dependent sugar phosphotransferase system	biological_process	1	1
6	GO:0007560	imaginal disc morphogenesis	biological_process	1	0.6
6	GO:0045475	locomotor rhythm	biological_process	1	1
6	GO:0051130	positive regulation of cell organization and biogenesis	biological_process	1	0.36
6	GO:0007224	smoothened signaling pathway	biological_process	1	0.36
6	GO:0007119	budding cell isotropic bud growth	biological_process	1	1
6	GO:0000903	cellular morphogenesis during vegetative growth	biological_process	1	1
6	GO:0007426	tracheal outgrowth (sensu Insecta)	biological_process	1	1
6	GO:0006308	DNA catabolism	biological_process	1	1
6	GO:0030225	macrophage differentiation	biological_process	1	1
6	GO:0031214	biomineral formation	biological_process	1	0.36
6	GO:0006929	substrate-bound cell migration	biological_process	1	0.6
6	GO:0006067	ethanol metabolism	biological_process	1	0.6
6	GO:0007118	budding cell apical bud growth	biological_process	1	1
6	GO:0015846	polyamine transport	biological_process	1	1
6	GO:0046937	phytochelatin metabolism	biological_process	1	0.6
6	GO:0006903	vesicle targeting	biological_process	1	0.6
6	GO:0035287	head segmentation	biological_process	1	0.36
6	GO:0016073	snRNA metabolism	biological_process	1	0.6
6	GO:0046184	aldehyde biosynthesis	biological_process	1	0.6
6	GO:0035152	regulation of tracheal tube architecture	biological_process	1	0.6
6	GO:0031156	regulation of fruiting body formation (sensu Dictyosteliida)	biological_process	1	0.6
6	GO:0008258	head involution	biological_process	1	1
6	GO:0030178	negative regulation of Wnt receptor signaling pathway	biological_process	1	1
6	GO:0007342	fusion of sperm to egg plasma membrane	biological_process	1	1
6	GO:0045621	positive regulation of lymphocyte differentiation	biological_process	1	1.2
6	GO:0048611	embryonic ectodermal gut development	biological_process	1	0.215
6	GO:0009723	response to ethylene stimulus	biological_process	1	0.6
6	GO:0030589	pseudocleavage (sensu Insecta)	biological_process	1	1
6	GO:0007395	dorsal closure, spreading of leading edge cells	biological_process	1	1
6	GO:0009453	energy taxis	biological_process	1	0.6
6	GO:0006022	aminoglycan metabolism	biological_process	1	0.36
6	GO:0008285	negative regulation of cell proliferation	biological_process	1	1
6	GO:0045216	intercellular junction assembly and/or maintenance	biological_process	1	1
6	GO:0009938	negative regulation of gibberellic acid mediated signaling	biological_process	1	1
6	GO:0046665	amnioserosa maintenance	biological_process	1	1
6	GO:0016482	cytoplasmic transport	biological_process	1	0.6
6	GO:0048557	embryonic digestive tract morphogenesis	biological_process	1	0.129
6	GO:0001560	regulation of cell growth by extracellular stimulus	biological_process	1	1
6	GO:0042689	regulation of crystal cell differentiation	biological_process	1	0.6
6	GO:0046330	positive regulation of JNK cascade	biological_process	1	1
6	GO:0042055	neuron lineage restriction	biological_process	1	1
7	GO:0006351	transcription, DNA-dependent	biological_process	342	197
7	GO:0045449	regulation of transcription	biological_process	340	184.8
7	GO:0006457	protein folding	biological_process	301	295.6
7	GO:0006412	protein biosynthesis	biological_process	236	138.7
7	GO:0044257	cellular protein catabolism	biological_process	159	67.02
7	GO:0006397	mRNA processing	biological_process	134	82.84
7	GO:0007001	chromosome organization and biogenesis (sensu Eukaryota)	biological_process	118	43.28
7	GO:0008380	RNA splicing	biological_process	113	22.28
7	GO:0006954	inflammatory response	biological_process	111	68.6
7	GO:0006461	protein complex assembly	biological_process	99	55.55
7	GO:0016310	phosphorylation	biological_process	86	44.26
7	GO:0007067	mitosis	biological_process	79	54.31
7	GO:0006605	protein targeting	biological_process	73	40.91
7	GO:0007046	ribosome biogenesis	biological_process	73	51.28
7	GO:0045934	negative regulation of nucleobase, nucleoside, nucleotide and nucleic acid metabolism	biological_process	71	18.58
7	GO:0006512	ubiquitin cycle	biological_process	58	41.51
7	GO:0007017	microtubule-based process	biological_process	52	28.21
7	GO:0009259	ribonucleotide metabolism	biological_process	46	5.31
7	GO:0006163	purine nucleotide metabolism	biological_process	45	4.921
7	GO:0030029	actin filament-based process	biological_process	44	17.76
7	GO:0045333	cellular respiration	biological_process	39	17.04
7	GO:0051168	nuclear export	biological_process	39	16.05
7	GO:0006092	main pathways of carbohydrate metabolism	biological_process	38	37.29
7	GO:0007126	meiosis	biological_process	36	23.77
7	GO:0017038	protein import	biological_process	36	20.16
7	GO:0051252	regulation of RNA metabolism	biological_process	36	13.91
7	GO:0009260	ribonucleotide biosynthesis	biological_process	35	5.97
7	GO:0006164	purine nucleotide biosynthesis	biological_process	34	5.322
7	GO:0051028	mRNA transport	biological_process	34	16.96
7	GO:0030467	establishment and/or maintenance of cell polarity (sensu Fungi)	biological_process	33	24.17
7	GO:0009141	nucleoside triphosphate metabolism	biological_process	32	3.435
7	GO:0006400	tRNA modification	biological_process	32	15.87
7	GO:0006084	acetyl-CoA metabolism	biological_process	31	20.24
7	GO:0009109	coenzyme catabolism	biological_process	29	10.44
7	GO:0044275	cellular carbohydrate catabolism	biological_process	29	5.762
7	GO:0006261	DNA-dependent DNA replication	biological_process	29	24.23
7	GO:0019318	hexose metabolism	biological_process	27	8.5
7	GO:0015672	monovalent inorganic cation transport	biological_process	25	8.862
7	GO:0008652	amino acid biosynthesis	biological_process	24	16.43
7	GO:0009108	coenzyme biosynthesis	biological_process	24	9.383
7	GO:0044264	cellular polysaccharide metabolism	biological_process	24	7.948
7	GO:0051170	nuclear import	biological_process	22	11.76
7	GO:0000165	MAPKKK cascade	biological_process	22	18.21
7	GO:0046365	monosaccharide catabolism	biological_process	22	5.068
7	GO:0016311	dephosphorylation	biological_process	21	14.6
7	GO:0031123	RNA 3'-end processing	biological_process	21	7.92
7	GO:0006752	group transfer coenzyme metabolism	biological_process	20	4.982
7	GO:0006631	fatty acid metabolism	biological_process	20	13.32
7	GO:0007018	microtubule-based movement	biological_process	20	18.72
7	GO:0043038	amino acid activation	biological_process	20	5.471
7	GO:0016126	sterol biosynthesis	biological_process	20	16.8
7	GO:0000084	S phase of mitotic cell cycle	biological_process	20	20
7	GO:0045935	positive regulation of nucleobase, nucleoside, nucleotide and nucleic acid metabolism	biological_process	19	5.016
7	GO:0006342	chromatin silencing	biological_process	19	18.8
7	GO:0009123	nucleoside monophosphate metabolism	biological_process	18	1.745
7	GO:0051258	protein polymerization	biological_process	18	14.33
7	GO:0006888	ER to Golgi transport	biological_process	17	17
7	GO:0046394	carboxylic acid biosynthesis	biological_process	17	9.72
7	GO:0042278	purine nucleoside metabolism	biological_process	17	4.536
7	GO:0009119	ribonucleoside metabolism	biological_process	17	4.536
7	GO:0042398	amino acid derivative biosynthesis	biological_process	16	4.895
7	GO:0031175	neurite morphogenesis	biological_process	15	10.65
7	GO:0015985	energy coupled proton transport, down electrochemical gradient	biological_process	15	6.84
7	GO:0030010	establishment of cell polarity	biological_process	15	6.576
7	GO:0006754	ATP biosynthesis	biological_process	15	6.84
7	GO:0042828	response to pathogen	biological_process	15	8.827
7	GO:0006887	exocytosis	biological_process	15	12.47
7	GO:0006644	phospholipid metabolism	biological_process	15	5.683
7	GO:0042401	biogenic amine biosynthesis	biological_process	15	7.56
7	GO:0000082	G1/S transition of mitotic cell cycle	biological_process	15	11.96
7	GO:0009993	oogenesis (sensu Insecta)	biological_process	14	9.912
7	GO:0009100	glycoprotein metabolism	biological_process	14	2.954
7	GO:0006486	protein amino acid glycosylation	biological_process	14	7.008
7	GO:0008544	epidermis development	biological_process	13	2.944
7	GO:0048311	mitochondrion distribution	biological_process	13	8.6
7	GO:0030952	establishment and/or maintenance of cytoskeleton polarity	biological_process	13	9.032
7	GO:0051261	protein depolymerization	biological_process	13	5.918
7	GO:0030001	metal ion transport	biological_process	12	6.992
7	GO:0031570	DNA integrity checkpoint	biological_process	12	8.615
7	GO:0006206	pyrimidine base metabolism	biological_process	12	5.6
7	GO:0010035	response to inorganic substance	biological_process	12	5.039
7	GO:0008033	tRNA processing	biological_process	12	10.8
7	GO:0006112	energy reserve metabolism	biological_process	12	6.792
7	GO:0040023	nuclear positioning	biological_process	12	6.064
7	GO:0009814	defense response to pathogen, incompatible interaction	biological_process	12	5.52
7	GO:0000077	DNA damage checkpoint	biological_process	12	11.36
7	GO:0006473	protein amino acid acetylation	biological_process	11	6.576
7	GO:0016051	carbohydrate biosynthesis	biological_process	11	3.76
7	GO:0007265	Ras protein signal transduction	biological_process	11	8.44
7	GO:0030261	chromosome condensation	biological_process	11	7.8
7	GO:0009618	response to pathogenic bacteria	biological_process	11	9.4
7	GO:0006289	nucleotide-excision repair	biological_process	11	9.4
7	GO:0006101	citrate metabolism	biological_process	11	11
7	GO:0008204	ergosterol metabolism	biological_process	11	6.6
7	GO:0035071	salivary gland cell death	biological_process	11	11
7	GO:0006401	RNA catabolism	biological_process	10	4.304
7	GO:0018193	peptidyl-amino acid modification	biological_process	10	3.311
7	GO:0006195	purine nucleotide catabolism	biological_process	10	2.159
7	GO:0007455	eye-antennal disc metamorphosis	biological_process	10	2.99
7	GO:0001745	compound eye morphogenesis (sensu Endopterygota)	biological_process	10	4.984
7	GO:0008654	phospholipid biosynthesis	biological_process	10	3.699
7	GO:0000086	G2/M transition of mitotic cell cycle	biological_process	10	8.16
7	GO:0015698	inorganic anion transport	biological_process	10	6
7	GO:0009261	ribonucleotide catabolism	biological_process	10	2.159
7	GO:0019856	pyrimidine base biosynthesis	biological_process	10	6
7	GO:0006595	polyamine metabolism	biological_process	10	5.616
7	GO:0006875	metal ion homeostasis	biological_process	10	5.32
7	GO:0006200	ATP catabolism	biological_process	10	10
7	GO:0042493	response to drug	biological_process	10	7.359
7	GO:0007169	transmembrane receptor protein tyrosine kinase signaling pathway	biological_process	9	4.439
7	GO:0006892	post-Golgi transport	biological_process	9	5.96
7	GO:0006783	heme biosynthesis	biological_process	9	8.6
7	GO:0016197	endosome transport	biological_process	9	6.6
7	GO:0006779	porphyrin biosynthesis	biological_process	9	5.16
7	GO:0001321	age-dependent general metabolic decline during replicative cell aging	biological_process	9	9
7	GO:0000282	bud site selection	biological_process	8	6.6
7	GO:0009072	aromatic amino acid family metabolism	biological_process	8	3.12
7	GO:0007093	mitotic checkpoint	biological_process	8	5.2
7	GO:0006090	pyruvate metabolism	biological_process	8	4.8
7	GO:0015674	di-, tri-valent inorganic cation transport	biological_process	8	3.792
7	GO:0006402	mRNA catabolism	biological_process	8	3.84
7	GO:0000080	G1 phase of mitotic cell cycle	biological_process	8	5.6
7	GO:0042981	regulation of apoptosis	biological_process	8	2.601
7	GO:0000096	sulfur amino acid metabolism	biological_process	8	5.008
7	GO:0009416	response to light	biological_process	8	4.472
7	GO:0009187	cyclic nucleotide metabolism	biological_process	7	2.376
7	GO:0030004	monovalent inorganic cation homeostasis	biological_process	7	1.847
7	GO:0006166	purine ribonucleoside salvage	biological_process	7	6.6
7	GO:0000741	karyogamy	biological_process	7	6.72
7	GO:0031577	spindle checkpoint	biological_process	7	4.2
7	GO:0006479	protein amino acid methylation	biological_process	7	4.2
7	GO:0042434	indole derivative metabolism	biological_process	7	1.655
7	GO:0001525	angiogenesis	biological_process	7	3.16
7	GO:0000742	karyogamy during conjugation with cellular fusion	biological_process	7	6.2
7	GO:0006586	indolalkylamine metabolism	biological_process	7	2.76
7	GO:0008213	protein amino acid alkylation	biological_process	7	2.52
7	GO:0000154	rRNA modification	biological_process	7	6.199
7	GO:0016485	protein processing	biological_process	7	3.879
7	GO:0009069	serine family amino acid metabolism	biological_process	7	3.407
7	GO:0030005	di-, tri-valent inorganic cation homeostasis	biological_process	7	4.799
7	GO:0006144	purine base metabolism	biological_process	7	2.76
7	GO:0045931	positive regulation of mitotic cell cycle	biological_process	7	7
7	GO:0042157	lipoprotein metabolism	biological_process	7	1.815
7	GO:0006935	chemotaxis	biological_process	7	7
7	GO:0009862	systemic acquired resistance, salicylic acid mediated signaling pathway	biological_process	7	7
7	GO:0000002	mitochondrial genome maintenance	biological_process	7	7
7	GO:0006071	glycerol metabolism	biological_process	7	5.4
7	GO:0030239	myofibril assembly	biological_process	7	4.6
7	GO:0051300	spindle pole body organization and biogenesis	biological_process	6	2.16
7	GO:0019935	cyclic-nucleotide-mediated signaling	biological_process	6	1.265
7	GO:0006220	pyrimidine nucleotide metabolism	biological_process	6	3.588
7	GO:0009064	glutamine family amino acid metabolism	biological_process	6	4.08
7	GO:0006665	sphingolipid metabolism	biological_process	6	2.848
7	GO:0008299	isoprenoid biosynthesis	biological_process	6	2.777
7	GO:0042455	ribonucleoside biosynthesis	biological_process	6	2.16
7	GO:0001510	RNA methylation	biological_process	6	4
7	GO:0009113	purine base biosynthesis	biological_process	6	3.599
7	GO:0007423	sensory organ development	biological_process	6	4.4
7	GO:0031028	septation initiation signaling	biological_process	6	6
7	GO:0019722	calcium-mediated signaling	biological_process	6	6
7	GO:0000749	response to pheromone during conjugation with cellular fusion	biological_process	6	4.129
7	GO:0009075	histidine family amino acid metabolism	biological_process	6	2.16
7	GO:0019236	response to pheromone	biological_process	6	3.077
7	GO:0045429	positive regulation of nitric oxide biosynthesis	biological_process	6	6
7	GO:0045792	negative regulation of cell size	biological_process	6	3.599
7	GO:0042451	purine nucleoside biosynthesis	biological_process	6	2.16
7	GO:0000090	mitotic anaphase	biological_process	5	4.2
7	GO:0043488	regulation of mRNA stability	biological_process	5	2.04
7	GO:0046364	monosaccharide biosynthesis	biological_process	5	1.512
7	GO:0051452	cellular pH reduction	biological_process	5	3
7	GO:0031291	Ran protein signal transduction	biological_process	5	5
7	GO:0010033	response to organic substance	biological_process	5	1.799
7	GO:0006733	oxidoreduction coenzyme metabolism	biological_process	5	1.025
7	GO:0042364	water-soluble vitamin biosynthesis	biological_process	5	2.52
7	GO:0016226	iron-sulfur cluster assembly	biological_process	5	5
7	GO:0030148	sphingolipid biosynthesis	biological_process	5	3.08
7	GO:0006041	glucosamine metabolism	biological_process	5	1.223
7	GO:0006298	mismatch repair	biological_process	5	4.6
7	GO:0043065	positive regulation of apoptosis	biological_process	5	2.536
7	GO:0048015	phosphoinositide-mediated signaling	biological_process	5	2.92
7	GO:0051029	rRNA transport	biological_process	5	3
7	GO:0007131	meiotic recombination	biological_process	5	5
7	GO:0007420	brain development	biological_process	4	2.8
7	GO:0046246	terpene biosynthesis	biological_process	4	1.296
7	GO:0007472	wing disc metamorphosis	biological_process	4	1.161
7	GO:0006749	glutathione metabolism	biological_process	4	3.2
7	GO:0050953	sensory perception of light	biological_process	4	2.4
7	GO:0008632	apoptotic program	biological_process	4	2.8
7	GO:0030865	cortical cytoskeleton organization and biogenesis	biological_process	4	2.159
7	GO:0031505	cell wall organization and biogenesis (sensu Fungi)	biological_process	4	1.847
7	GO:0043406	positive regulation of MAPK activity	biological_process	4	2.4
7	GO:0009066	aspartate family amino acid metabolism	biological_process	4	2.256
7	GO:0016045	detection of bacteria	biological_process	4	2.4
7	GO:0030835	negative regulation of actin filament depolymerization	biological_process	4	2.4
7	GO:0009596	detection of pest, pathogen or parasite	biological_process	4	2.4
7	GO:0042546	cell wall biosynthesis	biological_process	4	1.847
7	GO:0042773	ATP synthesis coupled electron transport	biological_process	4	1.44
7	GO:0046580	negative regulation of Ras protein signal transduction	biological_process	4	4
7	GO:0006972	hyperosmotic response	biological_process	4	2.8
7	GO:0030031	cell projection biogenesis	biological_process	4	3.176
7	GO:0006221	pyrimidine nucleotide biosynthesis	biological_process	4	2.647
7	GO:0012502	induction of programmed cell death	biological_process	4	1.536
7	GO:0016096	polyisoprenoid metabolism	biological_process	4	0.777
7	GO:0050982	detection of mechanical stimulus	biological_process	4	1.44
7	GO:0046348	amino sugar catabolism	biological_process	4	1.008
7	GO:0007308	oocyte construction	biological_process	4	0.875
7	GO:0007266	Rho protein signal transduction	biological_process	4	4
7	GO:0006108	malate metabolism	biological_process	4	4
7	GO:0000011	vacuole inheritance	biological_process	3	3
7	GO:0006476	protein amino acid deacetylation	biological_process	3	1.799
7	GO:0042726	riboflavin and derivative metabolism	biological_process	3	1.68
7	GO:0030703	eggshell formation	biological_process	3	0.647
7	GO:0007007	inner mitochondrial membrane organization and biogenesis	biological_process	3	1.799
7	GO:0045055	regulated secretory pathway	biological_process	3	1.96
7	GO:0030970	retrograde protein transport, ER to cytosol	biological_process	3	3
7	GO:0007419	ventral cord development	biological_process	3	3
7	GO:0006305	DNA alkylation	biological_process	3	1.799
7	GO:0030968	unfolded protein response	biological_process	3	3
7	GO:0015865	purine nucleotide transport	biological_process	3	2.6
7	GO:0007050	cell cycle arrest	biological_process	3	2.6
7	GO:0043066	negative regulation of apoptosis	biological_process	3	1.799
7	GO:0046294	formaldehyde catabolism	biological_process	3	3
7	GO:0007584	response to nutrients	biological_process	3	0.791
7	GO:0045338	farnesyl diphosphate metabolism	biological_process	3	1.08
7	GO:0051383	kinetochore organization and biogenesis	biological_process	3	3
7	GO:0009132	nucleoside diphosphate metabolism	biological_process	3	1.329
7	GO:0006113	fermentation	biological_process	3	1.56
7	GO:0009593	detection of chemical substance	biological_process	3	1.799
7	GO:0008203	cholesterol metabolism	biological_process	3	2.2
7	GO:0019362	pyridine nucleotide metabolism	biological_process	3	0.509
7	GO:0007039	vacuolar protein catabolism	biological_process	3	3
7	GO:0006306	DNA methylation	biological_process	3	3
7	GO:0000753	cellular morphogenesis during conjugation with cellular fusion	biological_process	3	2.216
7	GO:0030100	regulation of endocytosis	biological_process	3	3
7	GO:0035316	trichome organization and biogenesis (sensu Insecta)	biological_process	3	0.935
7	GO:0009651	response to salt stress	biological_process	3	1.319
7	GO:0006797	polyphosphate metabolism	biological_process	2	2
7	GO:0042559	pteridine and derivative biosynthesis	biological_process	2	1.2
7	GO:0006056	mannoprotein metabolism	biological_process	2	0.72
7	GO:0007606	sensory perception of chemical stimulus	biological_process	2	1.2
7	GO:0015718	monocarboxylic acid transport	biological_process	2	0.72
7	GO:0042176	regulation of protein catabolism	biological_process	2	0.72
7	GO:0006302	double-strand break repair	biological_process	2	1.6
7	GO:0001306	age-dependent response to oxidative stress	biological_process	2	1.2
7	GO:0001323	age-dependent general metabolic decline during chronological cell aging	biological_process	2	1.2
7	GO:0000216	M/G1 transition of mitotic cell cycle	biological_process	2	2
7	GO:0000750	signal transduction during conjugation with cellular fusion	biological_process	2	2
7	GO:0017006	protein-tetrapyrrole linkage	biological_process	2	0.72
7	GO:0030319	di-, tri-valent inorganic anion homeostasis	biological_process	2	1.2
7	GO:0009063	amino acid catabolism	biological_process	2	0.72
7	GO:0045017	glycerolipid biosynthesis	biological_process	2	0.72
7	GO:0031506	cell wall glycoprotein biosynthesis	biological_process	2	1.2
7	GO:0045861	negative regulation of proteolysis and peptidolysis	biological_process	2	2
7	GO:0006284	base-excision repair	biological_process	2	2
7	GO:0046834	lipid phosphorylation	biological_process	2	1.2
7	GO:0051488	anaphase-promoting complex activation	biological_process	2	1.2
7	GO:0008594	photoreceptor cell morphogenesis (sensu Endopterygota)	biological_process	2	0.72
7	GO:0010161	red light signaling pathway	biological_process	2	2
7	GO:0007232	osmosensory signaling pathway via Sho1 osmosensor	biological_process	2	2
7	GO:0001505	regulation of neurotransmitter levels	biological_process	2	0.816
7	GO:0006959	humoral immune response	biological_process	2	0.576
7	GO:0045921	positive regulation of exocytosis	biological_process	2	2
7	GO:0001706	endoderm formation	biological_process	2	2
7	GO:0050803	regulation of synapse structure and function	biological_process	2	0.96
7	GO:0006641	triacylglycerol metabolism	biological_process	2	1.2
7	GO:0009636	response to toxin	biological_process	2	2
7	GO:0006898	receptor mediated endocytosis	biological_process	2	2
7	GO:0045647	negative regulation of erythrocyte differentiation	biological_process	2	2
7	GO:0009311	oligosaccharide metabolism	biological_process	2	1.6
7	GO:0009262	deoxyribonucleotide metabolism	biological_process	2	1.2
7	GO:0048123	oocyte dorsal/ventral axis determination (sensu Insecta)	biological_process	2	0.72
7	GO:0042110	T cell activation	biological_process	2	1.216
7	GO:0046173	polyol biosynthesis	biological_process	2	1.2
7	GO:0042706	eye photoreceptor cell fate commitment	biological_process	2	0.72
7	GO:0007040	lysosome organization and biogenesis	biological_process	2	0.72
7	GO:0010004	gastrulation (sensu Insecta)	biological_process	2	3
7	GO:0007200	G-protein signaling, coupled to IP3 second messenger (phospholipase C activating)	biological_process	2	1.2
7	GO:0051437	positive regulation of ubiquitin ligase activity during mitotic cell cycle	biological_process	2	1.2
7	GO:0000501	flocculation (sensu Saccharomyces)	biological_process	2	2
7	GO:0042177	negative regulation of protein catabolism	biological_process	2	1.2
7	GO:0042462	eye photoreceptor cell development	biological_process	2	0.72
7	GO:0007178	transmembrane receptor protein serine/threonine kinase signaling pathway	biological_process	2	0.816
7	GO:0000018	regulation of DNA recombination	biological_process	2	1.799
7	GO:0006104	succinyl-CoA metabolism	biological_process	2	2
7	GO:0046463	acylglycerol biosynthesis	biological_process	2	1.2
7	GO:0019720	Mo-molybdopterin cofactor metabolism	biological_process	2	1.2
7	GO:0051126	negative regulation of actin nucleation	biological_process	2	2
7	GO:0006103	2-oxoglutarate metabolism	biological_process	2	2
7	GO:0007008	outer mitochondrial membrane organization and biogenesis	biological_process	1	0.6
7	GO:0000754	adaptation to pheromone during conjugation with cellular fusion	biological_process	1	1
7	GO:0007367	segment polarity determination	biological_process	1	1
7	GO:0000921	septin ring assembly	biological_process	1	1
7	GO:0051249	regulation of lymphocyte activation	biological_process	1	0.431
7	GO:0007138	meiotic anaphase II	biological_process	1	1
7	GO:0009411	response to UV	biological_process	1	1
7	GO:0000338	protein deneddylation	biological_process	1	1
7	GO:0016556	mRNA modification	biological_process	1	1
7	GO:0006277	DNA amplification	biological_process	1	0.6
7	GO:0016335	morphogenesis of larval imaginal disc epithelium	biological_process	1	1
7	GO:0043090	amino acid import	biological_process	1	1
7	GO:0031468	nuclear envelope reassembly	biological_process	1	1
7	GO:0006105	succinate metabolism	biological_process	1	1
7	GO:0031344	regulation of cell projection organization and biogenesis	biological_process	1	0.36
7	GO:0006313	DNA transposition	biological_process	1	0.6
7	GO:0030838	positive regulation of actin filament polymerization	biological_process	1	1
7	GO:0042690	negative regulation of crystal cell differentiation	biological_process	1	1
7	GO:0046822	regulation of nucleocytoplasmic transport	biological_process	1	0.6
7	GO:0007392	initiation of dorsal closure	biological_process	1	0.6
7	GO:0009615	response to virus	biological_process	1	1
7	GO:0006930	substrate-bound cell migration, cell extension	biological_process	1	1
7	GO:0007222	frizzled signaling pathway	biological_process	1	1
7	GO:0031297	collapsed replication fork processing	biological_process	1	1
7	GO:0050482	arachidonic acid secretion	biological_process	1	1
7	GO:0000196	MAPKKK cascade during cell wall biogenesis	biological_process	1	1
7	GO:0030808	regulation of nucleotide biosynthesis	biological_process	1	0.36
7	GO:0030073	insulin secretion	biological_process	1	1
7	GO:0007435	salivary gland morphogenesis	biological_process	1	1
7	GO:0007100	mitotic centrosome separation	biological_process	1	0.36
7	GO:0009583	detection of light	biological_process	1	0.6
7	GO:0050708	regulation of protein secretion	biological_process	1	1
7	GO:0048601	oocyte morphogenesis	biological_process	1	0.6
7	GO:0006909	phagocytosis	biological_process	1	1
7	GO:0051223	regulation of protein transport	biological_process	1	0.6
7	GO:0046349	amino sugar biosynthesis	biological_process	1	0.215
7	GO:0006890	retrograde transport, Golgi to ER	biological_process	1	1
7	GO:0019541	propionate metabolism	biological_process	1	1
7	GO:0048333	mesodermal cell differentiation	biological_process	1	0.6
7	GO:0008214	protein amino acid dealkylation	biological_process	1	0.36
7	GO:0016137	glycoside metabolism	biological_process	1	0.36
7	GO:0006471	protein amino acid ADP-ribosylation	biological_process	1	1
7	GO:0016925	protein sumoylation	biological_process	1	1
7	GO:0009650	UV protection	biological_process	1	1
7	GO:0045936	negative regulation of phosphate metabolism	biological_process	1	0.6
7	GO:0009749	response to glucose stimulus	biological_process	1	1
7	GO:0046444	FMN metabolism	biological_process	1	1
7	GO:0042723	thiamin and derivative metabolism	biological_process	1	0.36
7	GO:0035320	wing hair site selection	biological_process	1	1
7	GO:0009081	branched chain family amino acid metabolism	biological_process	1	0.6
7	GO:0035289	posterior head segmentation	biological_process	1	0.6
7	GO:0045582	positive regulation of T cell differentiation	biological_process	1	1
7	GO:0043112	receptor metabolism	biological_process	1	0.6
7	GO:0016180	snRNA processing	biological_process	1	1
7	GO:0048558	embryonic gut morphogenesis	biological_process	1	0.215
7	GO:0006140	regulation of nucleotide metabolism	biological_process	1	0.215
7	GO:0031157	regulation of aggregate size	biological_process	1	1
7	GO:0007298	border follicle cell migration (sensu Insecta)	biological_process	1	1
7	GO:0006097	glyoxylate cycle	biological_process	1	1
7	GO:0007442	hindgut morphogenesis	biological_process	1	0.36
7	GO:0030333	antigen processing	biological_process	1	0.6
7	GO:0007354	zygotic determination of anterior/posterior axis, embryo	biological_process	1	0.6
7	GO:0042113	B cell activation	biological_process	1	0.215
7	GO:0045736	negative regulation of cyclin dependent protein kinase activity	biological_process	1	1
7	GO:0006634	hexadecanal biosynthesis	biological_process	1	1
7	GO:0008630	DNA damage response, signal transduction resulting in induction of apoptosis	biological_process	1	1
7	GO:0007259	JAK-STAT cascade	biological_process	1	0.6
7	GO:0046664	dorsal closure, amnioserosa morphology change	biological_process	1	1
7	GO:0050776	regulation of immune response	biological_process	1	0.259
7	GO:0006107	oxaloacetate metabolism	biological_process	1	0.6
7	GO:0042331	phototaxis	biological_process	1	1
7	GO:0007520	myoblast fusion	biological_process	1	1
7	GO:0016601	Rac protein signal transduction	biological_process	1	1
7	GO:0048613	embryonic ectodermal gut morphogenesis	biological_process	1	0.36
7	GO:0009727	detection of ethylene stimulus	biological_process	1	1
7	GO:0031058	positive regulation of histone modification	biological_process	1	0.6
7	GO:0030203	glycosaminoglycan metabolism	biological_process	1	0.6
7	GO:0010212	response to ionizing radiation	biological_process	1	1
7	GO:0042402	biogenic amine catabolism	biological_process	1	0.215
7	GO:0008277	regulation of G-protein coupled receptor protein signaling pathway	biological_process	1	1
7	GO:0006968	cellular defense response	biological_process	1	0.36
7	GO:0006312	mitotic recombination	biological_process	1	0.6
7	GO:0051297	centrosome organization and biogenesis	biological_process	1	0.129
7	GO:0051030	snRNA transport	biological_process	1	0.6
7	GO:0006850	mitochondrial pyruvate transport	biological_process	1	1
7	GO:0001503	ossification	biological_process	1	0.6
7	GO:0007303	cytoplasmic transport, nurse cell to oocyte	biological_process	1	1
7	GO:0016598	protein arginylation	biological_process	1	1
7	GO:0006891	intra-Golgi transport	biological_process	1	0.6
7	GO:0042816	vitamin B6 metabolism	biological_process	1	0.36
7	GO:0046516	hypusine metabolism	biological_process	1	0.36
7	GO:0007000	nucleolus organization and biogenesis	biological_process	1	1
7	GO:0009307	DNA restriction-modification system	biological_process	1	1
7	GO:0007380	specification of segmental identity, head	biological_process	1	0.6
7	GO:0051031	tRNA transport	biological_process	1	0.6
7	GO:0000273	lipoic acid metabolism	biological_process	1	0.36
7	GO:0015711	organic anion transport	biological_process	1	0.36
7	GO:0042120	alginic acid metabolism	biological_process	1	0.6
7	GO:0008334	histone mRNA metabolism	biological_process	1	0.6
7	GO:0001522	pseudouridine synthesis	biological_process	1	0.6
7	GO:0009078	pyruvate family amino acid metabolism	biological_process	1	0.6
7	GO:0007396	suture of dorsal opening	biological_process	1	1
7	GO:0006026	aminoglycan catabolism	biological_process	1	0.6
7	GO:0000726	non-recombinational repair	biological_process	1	0.6
7	GO:0030011	maintenance of cell polarity	biological_process	1	0.6
7	GO:0019655	ethanol fermentation	biological_process	1	1
7	GO:0042219	amino acid derivative catabolism	biological_process	1	0.129
7	GO:0000103	sulfate assimilation	biological_process	1	1
7	GO:0006301	postreplication repair	biological_process	1	1
7	GO:0043407	negative regulation of MAPK activity	biological_process	1	0.6
7	GO:0046443	FAD metabolism	biological_process	1	0.6
7	GO:0046160	heme a metabolism	biological_process	1	0.6
7	GO:0000302	response to reactive oxygen species	biological_process	1	0.6
7	GO:0046607	positive regulation of centrosome cycle	biological_process	1	0.6
7	GO:0019220	regulation of phosphate metabolism	biological_process	1	0.36
7	GO:0000731	DNA synthesis during DNA repair	biological_process	1	1
7	GO:0051251	positive regulation of lymphocyte activation	biological_process	1	0.72
8	GO:0006355	regulation of transcription, DNA-dependent	biological_process	321	271.7
8	GO:0006508	proteolysis and peptidolysis	biological_process	159	111.7
8	GO:0043037	translation	biological_process	146	106.7
8	GO:0000398	nuclear mRNA splicing, via spliceosome	biological_process	109	93.53
8	GO:0000375	RNA splicing, via transesterification reactions	biological_process	109	33.67
8	GO:0016068	type I hypersensitivity	biological_process	106	106
8	GO:0006366	transcription from RNA polymerase II promoter	biological_process	100	62.32
8	GO:0006325	establishment and/or maintenance of chromatin architecture	biological_process	95	41.21
8	GO:0006417	regulation of protein biosynthesis	biological_process	68	34.72
8	GO:0006468	protein amino acid phosphorylation	biological_process	61	60.6
8	GO:0006364	rRNA processing	biological_process	46	36.8
8	GO:0009150	purine ribonucleotide metabolism	biological_process	45	8.202
8	GO:0030036	actin cytoskeleton organization and biogenesis	biological_process	44	29.6
8	GO:0016567	protein ubiquitination	biological_process	40	40.2
8	GO:0009060	aerobic respiration	biological_process	39	27.4
8	GO:0016481	negative regulation of transcription	biological_process	38	18.6
8	GO:0006405	RNA-nucleus export	biological_process	36	20.15
8	GO:0000070	mitotic sister chromatid segregation	biological_process	36	31.8
8	GO:0009152	purine ribonucleotide biosynthesis	biological_process	34	8.87
8	GO:0042255	ribosome assembly	biological_process	34	16.15
8	GO:0000226	microtubule cytoskeleton organization and biogenesis	biological_process	34	17.3
8	GO:0006406	mRNA-nucleus export	biological_process	33	26.6
8	GO:0009199	ribonucleoside triphosphate metabolism	biological_process	32	5.725
8	GO:0050684	regulation of mRNA processing	biological_process	31	21.96
8	GO:0009144	purine nucleoside triphosphate metabolism	biological_process	31	5.077
8	GO:0051253	negative regulation of RNA metabolism	biological_process	31	11.16
8	GO:0046356	acetyl-CoA catabolism	biological_process	29	17.4
8	GO:0006006	glucose metabolism	biological_process	24	10.84
8	GO:0006606	protein-nucleus import	biological_process	22	19.6
8	GO:0019320	hexose catabolism	biological_process	22	8.448
8	GO:0009142	nucleoside triphosphate biosynthesis	biological_process	21	3.205
8	GO:0006100	tricarboxylic acid cycle intermediate metabolism	biological_process	21	12.36
8	GO:0031124	mRNA 3'-end processing	biological_process	21	13.2
8	GO:0043039	tRNA aminoacylation	biological_process	20	9.12
8	GO:0006352	transcription initiation	biological_process	20	16.8
8	GO:0006383	transcription from RNA polymerase III promoter	biological_process	19	14.2
8	GO:0006073	glucan metabolism	biological_process	19	10.24
8	GO:0009161	ribonucleoside monophosphate metabolism	biological_process	18	2.908
8	GO:0006612	protein-membrane targeting	biological_process	18	7.055
8	GO:0009126	purine nucleoside monophosphate metabolism	biological_process	18	2.908
8	GO:0045047	protein-ER targeting	biological_process	18	7.055
8	GO:0045941	positive regulation of transcription	biological_process	18	7.76
8	GO:0046128	purine ribonucleoside metabolism	biological_process	17	7.56
8	GO:0006470	protein amino acid dephosphorylation	biological_process	17	17
8	GO:0007088	regulation of mitosis	biological_process	17	9.04
8	GO:0006633	fatty acid biosynthesis	biological_process	17	16.2
8	GO:0009124	nucleoside monophosphate biosynthesis	biological_process	17	2.548
8	GO:0006360	transcription from RNA polymerase I promoter	biological_process	15	14.2
8	GO:0030468	establishment of cell polarity (sensu Fungi)	biological_process	15	10.96
8	GO:0006085	acetyl-CoA biosynthesis	biological_process	15	13
8	GO:0006626	protein-mitochondrial targeting	biological_process	15	9.399
8	GO:0006753	nucleoside phosphate metabolism	biological_process	15	4.104
8	GO:0015986	ATP synthesis coupled proton transport	biological_process	15	11.39
8	GO:0009101	glycoprotein biosynthesis	biological_process	14	4.924
8	GO:0000723	telomere maintenance	biological_process	13	12.6
8	GO:0005977	glycogen metabolism	biological_process	12	11.32
8	GO:0007409	axonogenesis	biological_process	12	10.15
8	GO:0006696	ergosterol biosynthesis	biological_process	11	11
8	GO:0007097	nuclear migration	biological_process	11	8.44
8	GO:0006487	protein amino acid N-linked glycosylation	biological_process	11	6.68
8	GO:0007052	mitotic spindle organization and biogenesis	biological_process	11	7.2
8	GO:0007076	mitotic chromosome condensation	biological_process	11	11
8	GO:0006270	DNA replication initiation	biological_process	11	11
8	GO:0000001	mitochondrion inheritance	biological_process	11	11
8	GO:0007127	meiosis I	biological_process	11	6.36
8	GO:0009143	nucleoside triphosphate catabolism	biological_process	10	2.159
8	GO:0006207	'de novo' pyrimidine base biosynthesis	biological_process	10	10
8	GO:0030150	mitochondrial matrix protein import	biological_process	10	10
8	GO:0009154	purine ribonucleotide catabolism	biological_process	10	3.599
8	GO:0006650	glycerophospholipid metabolism	biological_process	10	3.139
8	GO:0006596	polyamine biosynthesis	biological_process	9	9
8	GO:0006611	protein-nucleus export	biological_process	9	6.6
8	GO:0010038	response to metal ion	biological_process	9	5.399
8	GO:0006379	mRNA cleavage	biological_process	8	8
8	GO:0006817	phosphate transport	biological_process	8	8
8	GO:0016358	dendrite morphogenesis	biological_process	8	7.6
8	GO:0006623	protein-vacuolar targeting	biological_process	8	7.2
8	GO:0007121	bipolar bud site selection	biological_process	8	8
8	GO:0046083	adenine metabolism	biological_process	7	4.6
8	GO:0046916	transition metal ion homeostasis	biological_process	7	4.199
8	GO:0009073	aromatic amino acid family biosynthesis	biological_process	7	2.76
8	GO:0051084	posttranslational protein folding	biological_process	7	4.199
8	GO:0046068	cGMP metabolism	biological_process	7	3.959
8	GO:0006568	tryptophan metabolism	biological_process	7	4.6
8	GO:0009190	cyclic nucleotide biosynthesis	biological_process	7	3.959
8	GO:0006072	glycerol-3-phosphate metabolism	biological_process	7	7
8	GO:0009627	systemic acquired resistance	biological_process	7	4.2
8	GO:0051131	chaperone-mediated protein complex assembly	biological_process	7	7
8	GO:0006271	DNA strand elongation	biological_process	7	3.64
8	GO:0006275	regulation of DNA replication	biological_process	7	7
8	GO:0007094	mitotic spindle checkpoint	biological_process	7	7
8	GO:0046129	purine ribonucleoside biosynthesis	biological_process	6	3.599
8	GO:0046219	indolalkylamine biosynthesis	biological_process	6	3.599
8	GO:0006348	chromatin silencing at telomere	biological_process	6	6
8	GO:0006353	transcription termination	biological_process	6	4.52
8	GO:0007091	mitotic metaphase/anaphase transition	biological_process	6	4.32
8	GO:0030308	negative regulation of cell growth	biological_process	6	6
8	GO:0042158	lipoprotein biosynthesis	biological_process	6	1.359
8	GO:0006534	cysteine metabolism	biological_process	6	5.08
8	GO:0042273	ribosomal large subunit biogenesis	biological_process	6	6
8	GO:0009076	histidine family amino acid biosynthesis	biological_process	6	3.599
8	GO:0000041	transition metal ion transport	biological_process	6	4.32
8	GO:0042674	cone cell differentiation (sensu Endopterygota)	biological_process	6	3.599
8	GO:0006547	histidine metabolism	biological_process	6	3.599
8	GO:0045765	regulation of angiogenesis	biological_process	6	3.599
8	GO:0045214	sarcomere organization	biological_process	6	6
8	GO:0044247	cellular polysaccharide catabolism	biological_process	6	2.976
8	GO:0019933	cAMP-mediated signaling	biological_process	6	2.108
8	GO:0015936	coenzyme A metabolism	biological_process	5	4.2
8	GO:0043487	regulation of RNA stability	biological_process	5	1.224
8	GO:0045005	maintenance of fidelity during DNA-dependent DNA replication	biological_process	5	2.76
8	GO:0006354	RNA elongation	biological_process	5	3.4
8	GO:0051225	spindle assembly	biological_process	5	3.4
8	GO:0018196	peptidyl-asparagine modification	biological_process	5	3
8	GO:0006044	N-acetylglucosamine metabolism	biological_process	5	2.04
8	GO:0019319	hexose biosynthesis	biological_process	5	2.519
8	GO:0030641	hydrogen ion homeostasis	biological_process	5	1.079
8	GO:0042147	retrograde transport, endosome to Golgi	biological_process	5	5
8	GO:0048288	nuclear membrane fusion during karyogamy	biological_process	5	5
8	GO:0006536	glutamate metabolism	biological_process	5	4.2
8	GO:0043279	response to alkaloid	biological_process	5	3
8	GO:0007035	vacuolar acidification	biological_process	5	5
8	GO:0007254	JNK cascade	biological_process	5	4.36
8	GO:0007187	G-protein signaling, coupled to cyclic nucleotide second messenger	biological_process	5	1.108
8	GO:0009626	hypersensitive response	biological_process	5	5
8	GO:0007089	traversing start control point of mitotic cell cycle	biological_process	5	5
8	GO:0006917	induction of apoptosis	biological_process	4	2.56
8	GO:0051016	barbed-end actin filament capping	biological_process	4	4
8	GO:0007173	epidermal growth factor receptor signaling pathway	biological_process	4	2.4
8	GO:0006458	'de novo' protein folding	biological_process	4	4
8	GO:0050954	sensory perception of mechanical stimulus	biological_process	4	2.4
8	GO:0046839	phospholipid dephosphorylation	biological_process	4	4
8	GO:0016579	protein deubiquitination	biological_process	4	4
8	GO:0009272	cell wall biosynthesis (sensu Fungi)	biological_process	4	3.079
8	GO:0000187	activation of MAPK activity	biological_process	4	4
8	GO:0006721	terpenoid metabolism	biological_process	4	1.296
8	GO:0046578	regulation of Ras protein signal transduction	biological_process	4	2.4
8	GO:0006043	glucosamine catabolism	biological_process	4	1.68
8	GO:0006268	DNA unwinding	biological_process	4	4
8	GO:0017157	regulation of exocytosis	biological_process	4	3.2
8	GO:0001751	eye photoreceptor cell differentiation (sensu Endopterygota)	biological_process	4	1.44
8	GO:0009241	polyisoprenoid biosynthesis	biological_process	4	1.296
8	GO:0007601	visual perception	biological_process	4	4
8	GO:0009598	detection of pathogenic bacteria	biological_process	4	4
8	GO:0030488	tRNA methylation	biological_process	4	4
8	GO:0006030	chitin metabolism	biological_process	4	2.4
8	GO:0000288	mRNA catabolism, deadenylylation-dependent decay	biological_process	4	2.8
8	GO:0000079	regulation of cyclin dependent protein kinase activity	biological_process	4	3.6
8	GO:0042775	ATP synthesis coupled electron transport (sensu Eukaryota)	biological_process	4	2.4
8	GO:0045896	regulation of transcription, mitotic	biological_process	4	2.08
8	GO:0006916	anti-apoptosis	biological_process	3	3
8	GO:0000097	sulfur amino acid biosynthesis	biological_process	3	1.679
8	GO:0009299	mRNA transcription	biological_process	3	3
8	GO:0006879	iron ion homeostasis	biological_process	3	3
8	GO:0042727	riboflavin and derivative biosynthesis	biological_process	3	1.799
8	GO:0007120	axial bud site selection	biological_process	3	3
8	GO:0000076	DNA replication checkpoint	biological_process	3	3
8	GO:0006531	aspartate metabolism	biological_process	3	2.8
8	GO:0006893	Golgi to plasma membrane transport	biological_process	3	2.6
8	GO:0006882	zinc ion homeostasis	biological_process	3	3
8	GO:0045337	farnesyl diphosphate biosynthesis	biological_process	3	1.799
8	GO:0009070	serine family amino acid biosynthesis	biological_process	3	1.679
8	GO:0000083	G1/S-specific transcription in mitotic cell cycle	biological_process	3	3
8	GO:0045039	mitochondrial inner membrane protein import	biological_process	3	3
8	GO:0000717	nucleotide-excision repair, DNA duplex unwinding	biological_process	3	3
8	GO:0006919	caspase activation	biological_process	3	3
8	GO:0007304	eggshell formation (sensu Insecta)	biological_process	3	1.08
8	GO:0035317	wing hair organization and biogenesis	biological_process	3	1.56
8	GO:0030466	chromatin silencing at silent mating-type cassette	biological_process	3	3
8	GO:0000394	RNA splicing, via endonucleolytic cleavage and ligation	biological_process	3	1.799
8	GO:0046685	response to arsenic	biological_process	3	3
8	GO:0009084	glutamine family amino acid biosynthesis	biological_process	3	1.799
8	GO:0009639	response to red or far red light	biological_process	3	1.319
8	GO:0000184	mRNA catabolism, nonsense-mediated decay	biological_process	3	3
8	GO:0005513	calcium ion sensing	biological_process	3	3
8	GO:0040020	regulation of meiosis	biological_process	3	2.6
8	GO:0030707	ovarian follicle cell development (sensu Insecta)	biological_process	3	1.008
8	GO:0006769	nicotinamide metabolism	biological_process	3	0.849
8	GO:0046519	sphingoid metabolism	biological_process	3	1.08
8	GO:0007205	protein kinase C activation	biological_process	2	2
8	GO:0009068	aspartate family amino acid catabolism	biological_process	2	1.2
8	GO:0000032	cell wall mannoprotein biosynthesis	biological_process	2	2
8	GO:0048110	oocyte construction (sensu Insecta)	biological_process	2	0.259
8	GO:0006624	vacuolar protein processing or maturation	biological_process	2	2
8	GO:0006057	mannoprotein biosynthesis	biological_process	2	1.2
8	GO:0016319	mushroom body development	biological_process	2	2
8	GO:0019432	triacylglycerol biosynthesis	biological_process	2	2
8	GO:0009220	pyrimidine ribonucleotide biosynthesis	biological_process	2	1.08
8	GO:0007293	egg chamber formation (sensu Insecta)	biological_process	2	0.72
8	GO:0030951	establishment and/or maintenance of microtubule cytoskeleton polarity	biological_process	2	0.72
8	GO:0006695	cholesterol biosynthesis	biological_process	2	2
8	GO:0017004	cytochrome complex assembly	biological_process	2	1.2
8	GO:0031365	N-terminal protein amino acid modification	biological_process	2	0.576
8	GO:0006267	pre-replicative complex formation and maintenance	biological_process	2	2
8	GO:0006896	Golgi to vacuole transport	biological_process	2	2
8	GO:0007269	neurotransmitter secretion	biological_process	2	1.359
8	GO:0006013	mannose metabolism	biological_process	2	0.72
8	GO:0016065	humoral defense mechanism (sensu Protostomia)	biological_process	2	0.96
8	GO:0009186	deoxyribonucleoside diphosphate metabolism	biological_process	2	2
8	GO:0006750	glutathione biosynthesis	biological_process	2	2
8	GO:0006114	glycerol biosynthesis	biological_process	2	2
8	GO:0019730	antimicrobial humoral response	biological_process	2	0.96
8	GO:0008293	torso signaling pathway	biological_process	2	2
8	GO:0051053	negative regulation of DNA metabolism	biological_process	2	1.2
8	GO:0048126	oocyte nucleus positioning (sensu Insecta)	biological_process	2	1.2
8	GO:0006895	Golgi to endosome transport	biological_process	2	2
8	GO:0030007	potassium ion homeostasis	biological_process	2	2
8	GO:0006777	Mo-molybdopterin cofactor biosynthesis	biological_process	2	2
8	GO:0006813	potassium ion transport	biological_process	2	2
8	GO:0001324	age-dependent response to oxidative stress during chronological cell aging	biological_process	2	2
8	GO:0006541	glutamine metabolism	biological_process	2	2
8	GO:0048017	inositol lipid-mediated signaling	biological_process	2	2
8	GO:0030722	oocyte nucleus positioning	biological_process	2	0.72
8	GO:0006771	riboflavin metabolism	biological_process	2	1.2
8	GO:0006000	fructose metabolism	biological_process	2	1.6
8	GO:0007374	posterior midgut invagination	biological_process	2	2
8	GO:0042051	eye photoreceptor development (sensu Endopterygota)	biological_process	2	1.2
8	GO:0050909	perception of taste	biological_process	2	2
8	GO:0007135	meiosis II	biological_process	2	1.2
8	GO:0009147	pyrimidine nucleoside triphosphate metabolism	biological_process	2	0.647
8	GO:0009067	aspartate family amino acid biosynthesis	biological_process	2	1.56
8	GO:0043157	response to cation stress	biological_process	2	1.2
8	GO:0045324	late endosome to vacuole transport	biological_process	2	2
8	GO:0006821	chloride transport	biological_process	2	2
8	GO:0000743	nuclear migration during conjugation with cellular fusion	biological_process	2	2
8	GO:0006816	calcium ion transport	biological_process	2	2
8	GO:0006904	vesicle docking during exocytosis	biological_process	2	2
8	GO:0008333	endosome to lysosome transport	biological_process	2	2
8	GO:0007092	anaphase-promoting complex activation during mitotic cell cycle	biological_process	2	2
8	GO:0030908	protein splicing	biological_process	2	1.2
8	GO:0042067	establishment of ommatidial polarity (sensu Endopterygota)	biological_process	2	1.6
8	GO:0030473	nuclear migration, microtubule-mediated	biological_process	2	1.2
8	GO:0010032	meiotic chromosome condensation	biological_process	2	2
8	GO:0006973	intracellular accumulation of glycerol	biological_process	2	2
8	GO:0000212	meiotic spindle organization and biogenesis	biological_process	2	1.2
8	GO:0030643	phosphate ion homeostasis	biological_process	2	2
8	GO:0046854	phosphoinositide phosphorylation	biological_process	2	2
8	GO:0009218	pyrimidine ribonucleotide metabolism	biological_process	2	0.647
8	GO:0048008	platelet-derived growth factor receptor signaling pathway	biological_process	2	2
8	GO:0007179	transforming growth factor beta receptor signaling pathway	biological_process	2	1.359
8	GO:0000092	mitotic anaphase B	biological_process	2	2
8	GO:0017003	protein-heme linkage	biological_process	2	1.2
8	GO:0030032	lamellipodium biogenesis	biological_process	1	1
8	GO:0006004	fucose metabolism	biological_process	1	1
8	GO:0006772	thiamin metabolism	biological_process	1	0.6
8	GO:0046604	positive regulation of mitotic centrosome separation	biological_process	1	1
8	GO:0009133	nucleoside diphosphate biosynthesis	biological_process	1	0.215
8	GO:0042538	hyperosmotic salinity response	biological_process	1	1
8	GO:0009082	branched chain family amino acid biosynthesis	biological_process	1	1
8	GO:0009637	response to blue light	biological_process	1	0.6
8	GO:0015893	drug transport	biological_process	1	0.6
8	GO:0045213	neurotransmitter receptor metabolism	biological_process	1	1
8	GO:0042325	regulation of phosphorylation	biological_process	1	0.6
8	GO:0008543	fibroblast growth factor receptor signaling pathway	biological_process	1	1
8	GO:0016066	cellular defense response (sensu Vertebrata)	biological_process	1	0.6
8	GO:0030183	B cell differentiation	biological_process	1	0.36
8	GO:0006743	ubiquinone metabolism	biological_process	1	0.6
8	GO:0006874	calcium ion homeostasis	biological_process	1	1
8	GO:0000019	regulation of mitotic recombination	biological_process	1	1
8	GO:0009185	ribonucleoside diphosphate metabolism	biological_process	1	0.215
8	GO:0043255	regulation of carbohydrate biosynthesis	biological_process	1	0.6
8	GO:0006042	glucosamine biosynthesis	biological_process	1	0.36
8	GO:0009105	lipoic acid biosynthesis	biological_process	1	0.6
8	GO:0031382	mating projection biogenesis	biological_process	1	0.36
8	GO:0015721	bile acid transport	biological_process	1	0.6
8	GO:0042724	thiamin and derivative biosynthesis	biological_process	1	0.6
8	GO:0042326	negative regulation of phosphorylation	biological_process	1	1
8	GO:0006295	nucleotide-excision repair, DNA incision, 3'-to lesion	biological_process	1	1
8	GO:0009106	lipoate metabolism	biological_process	1	0.6
8	GO:0007323	peptide pheromone maturation	biological_process	1	1
8	GO:0000751	cell cycle arrest in response to pheromone	biological_process	1	1
8	GO:0007377	germ-band extension	biological_process	1	1
8	GO:0008216	spermidine metabolism	biological_process	1	0.36
8	GO:0007143	female meiosis	biological_process	1	0.6
8	GO:0048619	embryonic hindgut morphogenesis	biological_process	1	0.6
8	GO:0007300	nurse cell to oocyte transport (sensu Insecta)	biological_process	1	1.2
8	GO:0006747	FAD biosynthesis	biological_process	1	1
8	GO:0006482	protein amino acid demethylation	biological_process	1	0.6
8	GO:0016139	glycoside catabolism	biological_process	1	0.6
8	GO:0006027	glycosaminoglycan catabolism	biological_process	1	1
8	GO:0018202	peptidyl-histidine modification	biological_process	1	0.36
8	GO:0031167	rRNA methylation	biological_process	1	1
8	GO:0042542	response to hydrogen peroxide	biological_process	1	1
8	GO:0030026	manganese ion homeostasis	biological_process	1	1
8	GO:0051013	microtubule severing	biological_process	1	1
8	GO:0050871	positive regulation of B cell activation	biological_process	1	0.6
8	GO:0030469	maintenance of cell polarity (sensu Fungi)	biological_process	1	1
8	GO:0006636	fatty acid desaturation	biological_process	1	1
8	GO:0007362	terminal region determination	biological_process	1	1
8	GO:0016540	protein autoprocessing	biological_process	1	0.6
8	GO:0019886	antigen processing, exogenous antigen via MHC class II	biological_process	1	1
8	GO:0030900	forebrain development	biological_process	1	1
8	GO:0050864	regulation of B cell activation	biological_process	1	0.36
8	GO:0000236	mitotic prometaphase	biological_process	1	1
8	GO:0006544	glycine metabolism	biological_process	1	0.6
8	GO:0045332	phospholipid translocation	biological_process	1	1
8	GO:0007307	chorion gene amplification	biological_process	1	1
8	GO:0007375	anterior midgut invagination	biological_process	1	1
8	GO:0018205	peptidyl-lysine modification	biological_process	1	0.6
8	GO:0051037	regulation of transcription, meiotic	biological_process	1	1
8	GO:0031086	mRNA catabolism, deadenylylation-independent decay	biological_process	1	0.6
8	GO:0031118	rRNA pseudouridine synthesis	biological_process	1	1
8	GO:0006299	short patch mismatch repair system	biological_process	1	1
8	GO:0006558	L-phenylalanine metabolism	biological_process	1	0.6
8	GO:0019660	glycolytic fermentation	biological_process	1	0.6
8	GO:0009061	anaerobic respiration	biological_process	1	1
8	GO:0042819	vitamin B6 biosynthesis	biological_process	1	0.6
8	GO:0000188	inactivation of MAPK activity	biological_process	1	1
8	GO:0030799	regulation of cyclic nucleotide metabolism	biological_process	1	0.36
8	GO:0006848	pyruvate transport	biological_process	1	0.6
8	GO:0000114	G1-specific transcription in mitotic cell cycle	biological_process	1	1
8	GO:0006555	methionine metabolism	biological_process	1	0.6
8	GO:0046663	dorsal closure, leading edge cell differentiation	biological_process	1	1
8	GO:0009642	response to light intensity	biological_process	1	0.6
8	GO:0006522	alanine metabolism	biological_process	1	1
8	GO:0006314	intron homing	biological_process	1	1
8	GO:0018206	peptidyl-methionine modification	biological_process	1	0.6
8	GO:0050667	homocysteine metabolism	biological_process	1	1
8	GO:0018201	peptidyl-glycine modification	biological_process	1	0.6
8	GO:0050863	regulation of T cell activation	biological_process	1	0.36
8	GO:0000301	retrograde transport, vesicle recycling within Golgi	biological_process	1	1
8	GO:0030035	microspike biogenesis	biological_process	1	0.6
8	GO:0006746	FADH2 metabolism	biological_process	1	0.6
8	GO:0006598	polyamine catabolism	biological_process	1	0.36
8	GO:0019363	pyridine nucleotide biosynthesis	biological_process	1	0.6
8	GO:0008614	pyridoxine metabolism	biological_process	1	0.6
8	GO:0006398	histone mRNA 3'-end processing	biological_process	1	1
8	GO:0050804	regulation of synaptic transmission	biological_process	1	0.6
8	GO:0001408	guanine nucleotide transport	biological_process	1	1
8	GO:0006303	double-strand break repair via nonhomologous end-joining	biological_process	1	1
8	GO:0050807	regulation of synapse structure	biological_process	1	1
8	GO:0042305	specification of segmental identity, mandibular segment	biological_process	1	1
8	GO:0001676	long-chain fatty acid metabolism	biological_process	1	0.6
8	GO:0045426	quinone cofactor biosynthesis	biological_process	1	0.6
8	GO:0007370	ventral furrow formation	biological_process	1	1
8	GO:0046515	hypusine biosynthesis	biological_process	1	0.6
8	GO:0006563	L-serine metabolism	biological_process	1	0.6
8	GO:0007602	phototransduction	biological_process	1	1
8	GO:0006475	internal protein amino acid acetylation	biological_process	1	1
8	GO:0009135	purine nucleoside diphosphate metabolism	biological_process	1	0.215
8	GO:0051054	positive regulation of DNA metabolism	biological_process	1	0.6
8	GO:0016079	synaptic vesicle exocytosis	biological_process	1	0.6
8	GO:0006525	arginine metabolism	biological_process	1	0.6
8	GO:0045040	mitochondrial outer membrane protein import	biological_process	1	1
8	GO:0006784	heme a biosynthesis	biological_process	1	1
8	GO:0015748	organophosphate ester transport	biological_process	1	0.6
8	GO:0051090	regulation of transcription factor activity	biological_process	1	1
8	GO:0046425	regulation of JAK-STAT cascade	biological_process	1	1
8	GO:0042122	alginic acid catabolism	biological_process	1	1
8	GO:0006528	asparagine metabolism	biological_process	1	0.36
8	GO:0031573	intra-S DNA damage checkpoint	biological_process	1	0.6
8	GO:0050870	positive regulation of T cell activation	biological_process	1	0.6
8	GO:0009312	oligosaccharide biosynthesis	biological_process	1	1
8	GO:0046602	regulation of mitotic centrosome separation	biological_process	1	0.6
8	GO:0016140	O-glycoside metabolism	biological_process	1	0.6
9	GO:0000377	RNA splicing, via transesterification reactions with bulged adenosine as nucleophile	biological_process	109	56.12
9	GO:0006357	regulation of transcription from RNA polymerase II promoter	biological_process	77	66.67
9	GO:0006445	regulation of translation	biological_process	67	56.2
9	GO:0016568	chromatin modification	biological_process	63	32.09
9	GO:0006413	translational initiation	biological_process	62	55.2
9	GO:0019941	modification-dependent protein catabolism	biological_process	59	26.32
9	GO:0006333	chromatin assembly or disassembly	biological_process	51	27.31
9	GO:0045892	negative regulation of transcription, DNA-dependent	biological_process	33	22.68
9	GO:0050686	negative regulation of mRNA processing	biological_process	31	18.59
9	GO:0048024	regulation of nuclear mRNA splicing, via spliceosome	biological_process	31	36.59
9	GO:0009205	purine ribonucleoside triphosphate metabolism	biological_process	31	8.462
9	GO:0000380	alternative nuclear mRNA splicing, via spliceosome	biological_process	30	18
9	GO:0006099	tricarboxylic acid cycle	biological_process	29	29
9	GO:0006414	translational elongation	biological_process	28	26.8
9	GO:0007015	actin filament organization	biological_process	23	17.08
9	GO:0006007	glucose catabolism	biological_process	22	14.08
9	GO:0006378	mRNA polyadenylylation	biological_process	21	21
9	GO:0042257	ribosomal subunit assembly	biological_process	21	12.59
9	GO:0009201	ribonucleoside triphosphate biosynthesis	biological_process	21	5.342
9	GO:0006418	tRNA aminoacylation for protein translation	biological_process	20	15.19
9	GO:0009145	purine nucleoside triphosphate biosynthesis	biological_process	20	4.262
9	GO:0009167	purine ribonucleoside monophosphate metabolism	biological_process	18	4.848
9	GO:0008154	actin polymerization and/or depolymerization	biological_process	18	8.854
9	GO:0006613	cotranslational protein-membrane targeting	biological_process	18	6.96
9	GO:0009156	ribonucleoside monophosphate biosynthesis	biological_process	17	4.247
9	GO:0009127	purine nucleoside monophosphate biosynthesis	biological_process	17	4.247
9	GO:0030490	processing of 20S pre-rRNA	biological_process	17	17
9	GO:0016973	poly(A)+ mRNA-nucleus export	biological_process	16	16
9	GO:0045893	positive regulation of transcription, DNA-dependent	biological_process	16	9.6
9	GO:0006515	misfolded or incompletely synthesized protein catabolism	biological_process	15	9.8
9	GO:0006367	transcription initiation from RNA polymerase II promoter	biological_process	14	14
9	GO:0006365	35S primary transcript processing	biological_process	14	14
9	GO:0007051	spindle organization and biogenesis	biological_process	14	6.639
9	GO:0007020	microtubule nucleation	biological_process	12	7.76
9	GO:0042256	mature ribosome assembly	biological_process	11	11
9	GO:0009146	purine nucleoside triphosphate catabolism	biological_process	10	3.599
9	GO:0009203	ribonucleoside triphosphate catabolism	biological_process	10	3.599
9	GO:0006513	protein monoubiquitination	biological_process	9	9
9	GO:0030384	phosphoinositide metabolism	biological_process	9	4.632
9	GO:0042776	ATP synthesis coupled proton transport (sensu Eukaryota)	biological_process	9	9
9	GO:0006384	transcription initiation from RNA polymerase III promoter	biological_process	9	9
9	GO:0000060	protein-nucleus import, translocation	biological_process	8	8
9	GO:0046474	glycerophospholipid biosynthesis	biological_process	8	2.832
9	GO:0006620	posttranslational protein-membrane targeting	biological_process	8	4.8
9	GO:0046686	response to cadmium ion	biological_process	8	8
9	GO:0046085	adenosine metabolism	biological_process	7	4.199
9	GO:0030162	regulation of proteolysis and peptidolysis	biological_process	7	6.2
9	GO:0000022	mitotic spindle elongation	biological_process	7	7
9	GO:0000059	protein-nucleus import, docking	biological_process	7	7
9	GO:0030832	regulation of actin filament length	biological_process	7	1.454
9	GO:0006182	cGMP biosynthesis	biological_process	7	6.6
9	GO:0000245	spliceosome assembly	biological_process	7	3.239
9	GO:0009096	aromatic amino acid family biosynthesis, anthranilate pathway	biological_process	6	3.599
9	GO:0000209	protein polyubiquitination	biological_process	6	6
9	GO:0000105	histidine biosynthesis	biological_process	6	6
9	GO:0000054	ribosome-nucleus export	biological_process	6	6
9	GO:0016525	negative regulation of angiogenesis	biological_process	6	6
9	GO:0030950	establishment and/or maintenance of actin cytoskeleton polarity	biological_process	6	6
9	GO:0007466	cone cell fate commitment (sensu Endopterygota)	biological_process	6	6
9	GO:0006497	protein lipidation	biological_process	6	2.265
9	GO:0046084	adenine biosynthesis	biological_process	6	6
9	GO:0007096	regulation of exit from mitosis	biological_process	6	6
9	GO:0006086	acetyl-CoA biosynthesis from pyruvate	biological_process	5	5
9	GO:0006374	nuclear mRNA splicing via U2-type spliceosome	biological_process	5	3.599
9	GO:0031000	response to caffeine	biological_process	5	5
9	GO:0045143	homologous chromosome segregation	biological_process	5	5
9	GO:0009250	glucan biosynthesis	biological_process	5	3.12
9	GO:0007188	G-protein signaling, coupled to cAMP nucleotide second messenger	biological_process	5	1.847
9	GO:0051453	regulation of cellular pH	biological_process	5	1.799
9	GO:0006407	rRNA-nucleus export	biological_process	5	5
9	GO:0018279	protein amino acid N-linked glycosylation via asparagine	biological_process	5	5
9	GO:0006607	NLS-bearing substrate-nucleus import	biological_process	4	4
9	GO:0006046	N-acetylglucosamine catabolism	biological_process	4	2.8
9	GO:0006273	lagging strand elongation	biological_process	4	2.4
9	GO:0030866	cortical actin cytoskeleton organization and biogenesis	biological_process	4	3.6
9	GO:0006368	RNA elongation from RNA polymerase II promoter	biological_process	4	4
9	GO:0006488	dolichol-linked oligosaccharide biosynthesis	biological_process	4	2.8
9	GO:0042026	protein refolding	biological_process	4	4
9	GO:0015956	bis(5'-nucleosidyl) oligophosphate metabolism	biological_process	4	2.4
9	GO:0005982	starch metabolism	biological_process	4	3.6
9	GO:0045010	actin nucleation	biological_process	4	2.719
9	GO:0016114	terpenoid biosynthesis	biological_process	4	2.159
9	GO:0006369	transcription termination from RNA polymerase II promoter	biological_process	4	4.2
9	GO:0007605	perception of sound	biological_process	4	4
9	GO:0042058	regulation of epidermal growth factor receptor signaling pathway	biological_process	4	4
9	GO:0006094	gluconeogenesis	biological_process	3	3
9	GO:0006120	mitochondrial electron transport, NADH to ubiquinone	biological_process	3	3
9	GO:0006359	regulation of transcription from RNA polymerase III promoter	biological_process	3	3
9	GO:0006829	zinc ion transport	biological_process	3	3
9	GO:0051293	establishment of spindle localization	biological_process	3	1.319
9	GO:0007306	insect chorion formation	biological_process	3	1.799
9	GO:0000289	poly(A) tail shortening	biological_process	3	3
9	GO:0045990	regulation of transcription by carbon catabolites	biological_process	3	1.319
9	GO:0031032	actomyosin structure organization and biogenesis	biological_process	3	1.08
9	GO:0006032	chitin catabolism	biological_process	3	3
9	GO:0051085	chaperone cofactor dependent protein folding	biological_process	3	3
9	GO:0046520	sphingoid biosynthesis	biological_process	3	1.799
9	GO:0031109	microtubule polymerization or depolymerization	biological_process	3	2.4
9	GO:0006388	tRNA splicing	biological_process	3	3
9	GO:0030472	mitotic spindle organization and biogenesis in nucleus	biological_process	3	3
9	GO:0030071	regulation of mitotic metaphase/anaphase transition	biological_process	3	2.2
9	GO:0007411	axon guidance	biological_process	3	2.6
9	GO:0010142	farnesyl diphosphate biosynthesis, mevalonate pathway	biological_process	3	3
9	GO:0019674	NAD metabolism	biological_process	2	1.2
9	GO:0009251	glucan catabolism	biological_process	2	0.96
9	GO:0001752	eye photoreceptor fate commitment (sensu Endopterygota)	biological_process	2	1.2
9	GO:0000393	spliceosomal conformational changes to generate catalytic conformation	biological_process	2	0.72
9	GO:0007064	mitotic sister chromatid cohesion	biological_process	2	2
9	GO:0006415	translational termination	biological_process	2	1.6
9	GO:0006826	iron ion transport	biological_process	2	1.6
9	GO:0051227	mitotic spindle assembly	biological_process	2	2
9	GO:0018063	cytochrome c-heme linkage	biological_process	2	2
9	GO:0031532	actin cytoskeleton reorganization	biological_process	2	1.2
9	GO:0015937	coenzyme A biosynthesis	biological_process	2	2
9	GO:0016325	oocyte microtubule cytoskeleton organization	biological_process	2	1.2
9	GO:0006533	aspartate catabolism	biological_process	2	2
9	GO:0019344	cysteine biosynthesis	biological_process	2	1.799
9	GO:0006356	regulation of transcription from RNA polymerase I promoter	biological_process	2	2
9	GO:0006960	antimicrobial humoral response (sensu Protostomia)	biological_process	2	1.6
9	GO:0007312	oocyte nucleus migration	biological_process	2	1.2
9	GO:0000387	spliceosomal snRNP biogenesis	biological_process	2	2
9	GO:0018409	peptide or protein amino-terminal blocking	biological_process	2	0.96
9	GO:0006272	leading strand elongation	biological_process	2	2
9	GO:0030706	oocyte differentiation (sensu Insecta)	biological_process	2	1.2
9	GO:0042052	rhabdomere development	biological_process	2	2
9	GO:0006537	glutamate biosynthesis	biological_process	2	2
9	GO:0051278	cell wall polysaccharide biosynthesis (sensu Fungi)	biological_process	2	1.799
9	GO:0051226	meiotic spindle assembly	biological_process	2	2
9	GO:0009231	riboflavin biosynthesis	biological_process	2	2
9	GO:0030489	processing of 27S pre-rRNA	biological_process	2	2
9	GO:0009208	pyrimidine ribonucleoside triphosphate metabolism	biological_process	2	1.08
9	GO:0045466	R7 cell differentiation	biological_process	2	1.2
9	GO:0008629	induction of apoptosis by intracellular signals	biological_process	2	1.6
9	GO:0016539	intein-mediated protein splicing	biological_process	2	2
9	GO:0030978	alpha-glucan metabolism	biological_process	2	1.2
9	GO:0019673	GDP-mannose metabolism	biological_process	2	1.2
9	GO:0006824	cobalt ion transport	biological_process	2	2
9	GO:0045910	negative regulation of DNA recombination	biological_process	2	2
9	GO:0019307	mannose biosynthesis	biological_process	2	1.2
9	GO:0006825	copper ion transport	biological_process	1	0.6
9	GO:0006610	ribosomal protein-nucleus import	biological_process	1	1
9	GO:0006003	fructose 2,6-bisphosphate metabolism	biological_process	1	1
9	GO:0006744	ubiquinone biosynthesis	biological_process	1	1
9	GO:0007004	telomerase-dependent telomere maintenance	biological_process	1	1
9	GO:0042087	cell-mediated immune response	biological_process	1	1
9	GO:0008615	pyridoxine biosynthesis	biological_process	1	1
9	GO:0042787	protein ubiquitination during ubiquitin-dependent protein catabolism	biological_process	1	1
9	GO:0009638	phototropism	biological_process	1	1
9	GO:0019731	antibacterial humoral response	biological_process	1	0.6
9	GO:0046203	spermidine catabolism	biological_process	1	0.6
9	GO:0006121	mitochondrial electron transport, succinate to ubiquinone	biological_process	1	1
9	GO:0017182	peptidyl-diphthamide metabolism	biological_process	1	0.6
9	GO:0001407	glycerophosphodiester transport	biological_process	1	1
9	GO:0045144	meiotic sister chromatid segregation	biological_process	1	1
9	GO:0035066	positive regulation of histone acetylation	biological_process	1	1
9	GO:0016321	female meiosis chromosome segregation	biological_process	1	1
9	GO:0009228	thiamin biosynthesis	biological_process	1	1
9	GO:0030802	regulation of cyclic nucleotide biosynthesis	biological_process	1	0.6
9	GO:0042306	regulation of protein-nucleus import	biological_process	1	1
9	GO:0008612	hypusine biosynthesis from peptidyl-lysine	biological_process	1	1
9	GO:0009094	L-phenylalanine biosynthesis	biological_process	1	1
9	GO:0016108	tetraterpenoid metabolism	biological_process	1	0.36
9	GO:0030497	fatty acid elongation	biological_process	1	1
9	GO:0046777	protein amino acid autophosphorylation	biological_process	1	1
9	GO:0009136	purine nucleoside diphosphate biosynthesis	biological_process	1	0.36
9	GO:0006529	asparagine biosynthesis	biological_process	1	0.6
9	GO:0031087	deadenylylation-independent decapping	biological_process	1	1
9	GO:0045836	positive regulation of meiosis	biological_process	1	1
9	GO:0050806	positive regulation of synaptic transmission	biological_process	1	1
9	GO:0009644	response to high light intensity	biological_process	1	1
9	GO:0045577	regulation of B cell differentiation	biological_process	1	0.6
9	GO:0009086	methionine biosynthesis	biological_process	1	1
9	GO:0006532	aspartate biosynthesis	biological_process	1	1
9	GO:0008624	induction of apoptosis by extracellular signals	biological_process	1	1
9	GO:0006031	chitin biosynthesis	biological_process	1	1
9	GO:0007129	synapsis	biological_process	1	0.6
9	GO:0043001	Golgi to plasma membrane protein transport	biological_process	1	1
9	GO:0007413	axonal fasciculation	biological_process	1	1
9	GO:0006739	NADP metabolism	biological_process	1	0.215
9	GO:0009179	purine ribonucleoside diphosphate metabolism	biological_process	1	0.36
9	GO:0031383	regulation of mating projection biogenesis	biological_process	1	0.6
9	GO:0035318	wing hair outgrowth	biological_process	1	1
9	GO:0030243	cellulose metabolism	biological_process	1	0.6
9	GO:0016080	synaptic vesicle targeting	biological_process	1	1
9	GO:0046328	regulation of JNK cascade	biological_process	1	0.6
9	GO:0050773	regulation of dendrite morphogenesis	biological_process	1	1
9	GO:0051273	beta-glucan metabolism	biological_process	1	0.36
9	GO:0006545	glycine biosynthesis	biological_process	1	1
9	GO:0009107	lipoate biosynthesis	biological_process	1	1
9	GO:0006408	snRNA-nucleus export	biological_process	1	1
9	GO:0006045	N-acetylglucosamine biosynthesis	biological_process	1	0.6
9	GO:0030823	regulation of cGMP metabolism	biological_process	1	0.6
9	GO:0006409	tRNA-nucleus export	biological_process	1	1
9	GO:0016142	O-glycoside catabolism	biological_process	1	1
9	GO:0007443	Malpighian tubule morphogenesis	biological_process	1	1
9	GO:0006011	UDP-glucose metabolism	biological_process	1	1
9	GO:0008335	ovarian ring canal stabilization	biological_process	1	1
9	GO:0046847	filopodium formation	biological_process	1	1
9	GO:0015722	canalicular bile acid transport	biological_process	1	1
9	GO:0009188	ribonucleoside diphosphate biosynthesis	biological_process	1	0.36
9	GO:0045579	positive regulation of B cell differentiation	biological_process	1	1
9	GO:0046618	drug export	biological_process	1	1
9	GO:0016318	ommatidial rotation	biological_process	1	1
9	GO:0006734	NADH metabolism	biological_process	1	0.6
9	GO:0046470	phosphatidylcholine metabolism	biological_process	1	0.6
9	GO:0010042	response to manganese ion	biological_process	1	1
9	GO:0042759	long-chain fatty acid biosynthesis	biological_process	1	1
9	GO:0006526	arginine biosynthesis	biological_process	1	1
10	GO:0006511	ubiquitin-dependent protein catabolism	biological_process	59	43.87
10	GO:0006338	chromatin remodeling	biological_process	56	40.56
10	GO:0031497	chromatin assembly	biological_process	35	18.52
10	GO:0048025	negative regulation of nuclear mRNA splicing, via spliceosome	biological_process	31	31
10	GO:0000381	regulation of alternative nuclear mRNA splicing, via spliceosome	biological_process	30	30
10	GO:0009206	purine ribonucleoside triphosphate biosynthesis	biological_process	20	7.104
10	GO:0016569	covalent chromatin modification	biological_process	20	7.929
10	GO:0000027	ribosomal large subunit assembly and maintenance	biological_process	18	18
10	GO:0006614	SRP-dependent cotranslational protein-membrane targeting	biological_process	18	11.6
10	GO:0006446	regulation of translational initiation	biological_process	17	17
10	GO:0009168	purine ribonucleoside monophosphate biosynthesis	biological_process	17	7.08
10	GO:0006096	glycolysis	biological_process	17	16.2
10	GO:0000122	negative regulation of transcription from RNA polymerase II promoter	biological_process	14	12.8
10	GO:0030433	ER-associated protein catabolism	biological_process	13	13
10	GO:0046040	IMP metabolism	biological_process	13	4.68
10	GO:0007021	tubulin folding	biological_process	10	9.6
10	GO:0009207	purine ribonucleoside triphosphate catabolism	biological_process	10	6
10	GO:0030042	actin filament depolymerization	biological_process	10	6.864
10	GO:0031204	posttranslational protein membrane targeting, translocation	biological_process	8	8
10	GO:0051017	actin filament bundle formation	biological_process	8	4.8
10	GO:0008064	regulation of actin polymerization and/or depolymerization	biological_process	7	2.424
10	GO:0051231	spindle elongation	biological_process	7	4.2
10	GO:0046489	phosphoinositide biosynthesis	biological_process	7	3.719
10	GO:0000162	tryptophan biosynthesis	biological_process	6	6
10	GO:0030041	actin filament polymerization	biological_process	6	4.56
10	GO:0046086	adenosine biosynthesis	biological_process	6	6
10	GO:0046488	phosphatidylinositol metabolism	biological_process	5	3.8
10	GO:0046039	GTP metabolism	biological_process	5	3
10	GO:0046037	GMP metabolism	biological_process	5	3.4
10	GO:0045944	positive regulation of transcription from RNA polymerase II promoter	biological_process	5	5
10	GO:0045761	regulation of adenylate cyclase activity	biological_process	5	3.08
10	GO:0006505	GPI anchor metabolism	biological_process	4	1.92
10	GO:0000348	nuclear mRNA branch site recognition	biological_process	4	2.4
10	GO:0006422	aspartyl-tRNA aminoacylation	biological_process	4	4
10	GO:0015959	diadenosine polyphosphate metabolism	biological_process	4	4
10	GO:0006430	lysyl-tRNA aminoacylation	biological_process	4	4
10	GO:0006450	regulation of translational fidelity	biological_process	4	4
10	GO:0006376	mRNA splice site selection	biological_process	3	3
10	GO:0000912	cytokinesis, formation of actomyosin apparatus	biological_process	3	1.799
10	GO:0046015	regulation of transcription by glucose	biological_process	3	2.2
10	GO:0006448	regulation of translational elongation	biological_process	3	3
10	GO:0000028	ribosomal small subunit assembly and maintenance	biological_process	3	3
10	GO:0040001	establishment of mitotic spindle localization	biological_process	3	2.2
10	GO:0007068	negative regulation of transcription, mitotic	biological_process	3	1.799
10	GO:0046021	regulation of transcription from RNA polymerase II promoter, mitotic	biological_process	3	1.799
10	GO:0007019	microtubule depolymerization	biological_process	3	3
10	GO:0006269	DNA replication, synthesis of RNA primer	biological_process	3	3
10	GO:0006490	oligosaccharide-lipid intermediate assembly	biological_process	3	3
10	GO:0007189	G-protein signaling, adenylate cyclase activating pathway	biological_process	3	1.799
10	GO:0046512	sphingosine biosynthesis	biological_process	3	3
10	GO:0045013	negative regulation of transcription by carbon catabolites	biological_process	2	1.2
10	GO:0019343	cysteine biosynthesis via cystathione	biological_process	2	2
10	GO:0045946	positive regulation of translation	biological_process	2	2
10	GO:0048128	oocyte nucleus migration (sensu Insecta)	biological_process	2	2
10	GO:0007294	oocyte fate determination (sensu Insecta)	biological_process	2	2
10	GO:0006474	N-terminal protein amino acid acetylation	biological_process	2	1.6
10	GO:0030037	actin filament reorganization during cell cycle	biological_process	2	2
10	GO:0007465	R7 cell fate commitment	biological_process	2	2
10	GO:0051125	regulation of actin nucleation	biological_process	2	1.2
10	GO:0006426	glycyl-tRNA aminoacylation	biological_process	2	2
10	GO:0005980	glycogen catabolism	biological_process	2	1.6
10	GO:0006423	cysteinyl-tRNA aminoacylation	biological_process	2	2
10	GO:0006421	asparaginyl-tRNA aminoacylation	biological_process	2	2
10	GO:0006434	seryl-tRNA aminoacylation	biological_process	2	2
10	GO:0000349	formation of catalytic spliceosome for first transesterification step	biological_process	2	1.2
10	GO:0006433	prolyl-tRNA aminoacylation	biological_process	2	2
10	GO:0009298	GDP-mannose biosynthesis	biological_process	2	2
10	GO:0006431	methionyl-tRNA aminoacylation	biological_process	2	2
10	GO:0046843	dorsal appendage formation	biological_process	2	2
10	GO:0018377	protein myristoylation	biological_process	2	0.576
10	GO:0046036	CTP metabolism	biological_process	2	1.2
10	GO:0009209	pyrimidine ribonucleoside triphosphate biosynthesis	biological_process	2	1.799
10	GO:0051294	establishment of spindle orientation	biological_process	2	1.2
10	GO:0030979	alpha-glucan biosynthesis	biological_process	2	2
10	GO:0051274	beta-glucan biosynthesis	biological_process	1	0.6
10	GO:0006358	regulation of global transcription from RNA polymerase II promoter	biological_process	1	1
10	GO:0006656	phosphatidylcholine biosynthesis	biological_process	1	1
10	GO:0031384	regulation of initiation of mating projection growth	biological_process	1	1
10	GO:0016478	negative regulation of translation	biological_process	1	1
10	GO:0009435	NAD biosynthesis	biological_process	1	1
10	GO:0000147	actin cortical patch assembly	biological_process	1	1
10	GO:0009180	purine ribonucleoside diphosphate biosynthesis	biological_process	1	0.6
10	GO:0048250	mitochondrial iron ion transport	biological_process	1	1
10	GO:0005978	glycogen biosynthesis	biological_process	1	0.6
10	GO:0042766	nucleosome mobilization	biological_process	1	1
10	GO:0006535	cysteine biosynthesis from serine	biological_process	1	1
10	GO:0046031	ADP metabolism	biological_process	1	0.6
10	GO:0006169	adenosine salvage	biological_process	1	1
10	GO:0019252	starch biosynthesis	biological_process	1	1
10	GO:0043137	DNA replication, removal of RNA primer	biological_process	1	1
10	GO:0006740	NADPH regeneration	biological_process	1	0.36
10	GO:0006116	NADH oxidation	biological_process	1	1
10	GO:0050983	spermidine catabolism to deoxyhypusine, using deoxyhypusine synthase	biological_process	1	1
10	GO:0030847	transcription termination from Pol II promoter, RNA polymerase(A)-independent	biological_process	1	1
10	GO:0046051	UTP metabolism	biological_process	1	0.6
10	GO:0016109	tetraterpenoid biosynthesis	biological_process	1	0.6
10	GO:0001672	regulation of chromatin assembly or disassembly	biological_process	1	1
10	GO:0016116	carotenoid metabolism	biological_process	1	0.6
10	GO:0006961	antibacterial humoral response (sensu Protostomia)	biological_process	1	1
10	GO:0030999	linear element formation	biological_process	1	1
10	GO:0030846	transcription termination from Pol II promoter, RNA polymerase(A) coupled	biological_process	1	1
10	GO:0006428	isoleucyl-tRNA aminoacylation	biological_process	1	1
10	GO:0006444	nascent polypeptide association	biological_process	1	1
10	GO:0046785	microtubule polymerization	biological_process	1	1
10	GO:0015680	intracellular copper ion transport	biological_process	1	1
10	GO:0030244	cellulose biosynthesis	biological_process	1	1
10	GO:0006424	glutamyl-tRNA aminoacylation	biological_process	1	1
10	GO:0019266	asparagine biosynthesis from oxaloacetate	biological_process	1	1
10	GO:0030826	regulation of cGMP biosynthesis	biological_process	1	1
10	GO:0008045	motor axon guidance	biological_process	1	1
10	GO:0006098	pentose-phosphate shunt	biological_process	1	0.6
10	GO:0006074	beta-1,3 glucan metabolism	biological_process	1	0.6
11	GO:0043161	proteasomal ubiquitin-dependent protein catabolism	biological_process	31	24.11
11	GO:0016570	histone modification	biological_process	20	13.21
11	GO:0031507	heterochromatin formation	biological_process	19	11.28
11	GO:0006334	nucleosome assembly	biological_process	17	16.6
11	GO:0006616	SRP-dependent cotranslational protein-membrane targeting, translocation	biological_process	15	15
11	GO:0006188	IMP biosynthesis	biological_process	13	7.8
11	GO:0006345	loss of chromatin silencing	biological_process	8	8
11	GO:0006183	GTP biosynthesis	biological_process	5	5
11	GO:0031055	chromatin remodeling at centromere	biological_process	4	1.44
11	GO:0030834	regulation of actin filament depolymerization	biological_process	4	1.44
11	GO:0006506	GPI anchor biosynthesis	biological_process	4	3.2
11	GO:0045011	actin cable formation	biological_process	4	4
11	GO:0006177	GMP biosynthesis	biological_process	4	4
11	GO:0030046	parallel actin filament bundle formation	biological_process	4	4
11	GO:0000370	U2-type nuclear mRNA branch site recognition	biological_process	4	4
11	GO:0048096	chromatin-mediated maintenance of transcription	biological_process	3	3
11	GO:0007190	adenylate cyclase activation	biological_process	3	3
11	GO:0000915	cytokinesis, contractile ring formation	biological_process	3	3
11	GO:0006661	phosphatidylinositol biosynthesis	biological_process	3	3
11	GO:0007070	negative regulation of transcription from RNA polymerase II promoter, mitotic	biological_process	3	3
11	GO:0030833	regulation of actin filament polymerization	biological_process	3	2.6
11	GO:0016584	nucleosome spacing	biological_process	3	3
11	GO:0000132	establishment of mitotic spindle orientation	biological_process	2	2
11	GO:0043156	chromatin remodeling in response to cation stress	biological_process	2	2
11	GO:0006241	CTP biosynthesis	biological_process	2	2
11	GO:0045014	negative regulation of transcription by glucose	biological_process	2	2
11	GO:0018319	protein amino acid myristoylation	biological_process	2	0.96
11	GO:0043162	ubiquitin-dependent protein catabolism via the multivesicular body pathway	biological_process	2	2
11	GO:0006110	regulation of glycolysis	biological_process	2	2
11	GO:0000356	U2-type catalytic spliceosome formation for first transesterification step	biological_process	2	2
11	GO:0006172	ADP biosynthesis	biological_process	1	1
11	GO:0006075	beta-1,3 glucan biosynthesis	biological_process	1	1
11	GO:0006617	SRP-dependent cotranslational protein-membrane targeting, signal sequence recognition	biological_process	1	1
11	GO:0006228	UTP biosynthesis	biological_process	1	1
11	GO:0007022	chaperonin-mediated tubulin folding	biological_process	1	1
11	GO:0005981	regulation of glycogen catabolism	biological_process	1	1
11	GO:0016117	carotenoid biosynthesis	biological_process	1	1
11	GO:0005979	regulation of glycogen biosynthesis	biological_process	1	1
11	GO:0017196	N-terminal peptidyl-methionine acetylation	biological_process	1	1
11	GO:0009051	pentose-phosphate shunt, oxidative branch	biological_process	1	1
12	GO:0006189	'de novo' IMP biosynthesis	biological_process	13	13
12	GO:0016573	histone acetylation	biological_process	9	8.36
12	GO:0016571	histone methylation	biological_process	7	7
12	GO:0031509	telomeric heterochromatin formation	biological_process	6	3.599
12	GO:0008054	cyclin catabolism	biological_process	6	6
12	GO:0031145	anaphase-promoting complex-dependent proteasomal ubiquitin-dependent protein catabolism	biological_process	5	4.2
12	GO:0031508	centric heterochromatin formation	biological_process	4	2.4
12	GO:0016575	histone deacetylation	biological_process	3	3
12	GO:0016255	attachment of GPI anchor to protein	biological_process	2	2
12	GO:0031146	SCF-dependent proteasomal ubiquitin-dependent protein catabolism	biological_process	2	2
12	GO:0006499	N-terminal protein myristoylation	biological_process	2	1.6
12	GO:0016577	histone demethylation	biological_process	1	1
12	GO:0006335	DNA replication-dependent nucleosome assembly	biological_process	1	1
12	GO:0016574	histone ubiquitination	biological_process	1	1
12	GO:0031056	regulation of histone modification	biological_process	1	0.36
13	GO:0030702	chromatin silencing at centromere	biological_process	4	4
13	GO:0018008	N-terminal peptidyl-glycine N-myristoylation	biological_process	1	1
13	GO:0035065	regulation of histone acetylation	biological_process	1	0.6
