# Supplementary material for: Transcriptome of Pneumocystis carinii during Fulminate Infection: Carbohydrate Metabolism and the Concept of a Compatible Parasite
Source: PLoS One. 2007 May 9;2(5):e423. doi: 10.1371/journal.pone.0000423 (PMC1855432; doi:10.1371/journal.pone.0000423)
Supplement: Table S3 — EST BLAST2GO Cellular Compartmentalization Assignments-All levels. Hierarchical distribution of the cellular compartmentalization assignments of the ESTs by BLAST2GO. (0.08 MB XLS) [file pone.0000423.s006.xls]

## Sheet: ESTCellComp. Table 3
#level	go_num	function	category	num_hits	score
1	GO:0005575	cellular_component	cellular_component	1283	509.3
1	obsolete_cellular_component	obsolete_cellular_component	cellular_component	1	0.6
2	GO:0005623	cell	cellular_component	1261	572.7
2	GO:0043226	organelle	cellular_component	1041	226.6
2	GO:0043234	protein complex	cellular_component	576	314.5
2	GO:0008372	cellular component unknown	cellular_component	108	108
2	GO:0005576	extracellular region	cellular_component	42	28.36
2	GO:0019012	virion	cellular_component	4	1.247
2	GO:0031012	extracellular matrix	cellular_component	2	0.96
2	GO:0005837	26S proteasome	cellular_component	1	1
3	GO:0005622	intracellular	cellular_component	1218	724.2
3	GO:0043227	membrane-bound organelle	cellular_component	924	313.4
3	GO:0043228	non-membrane-bound organelle	cellular_component	399	97.92
3	GO:0016020	membrane	cellular_component	333	157.4
3	GO:0000267	cell fraction	cellular_component	54	30.28
3	GO:0005615	extracellular space	cellular_component	34	34
3	GO:0030312	external encapsulating structure	cellular_component	30	9.504
3	GO:0042995	cell projection	cellular_component	24	11.87
3	GO:0005941	unlocalized protein complex	cellular_component	23	12.11
3	GO:0030427	site of polarized growth	cellular_component	22	20.48
3	GO:0009986	cell surface	cellular_component	20	20
3	GO:0005933	bud	cellular_component	19	13.36
3	GO:0043233	organelle lumen	cellular_component	14	8.4
3	GO:0051286	cell tip	cellular_component	14	8.8
3	GO:0045261	proton-transporting ATP synthase complex, catalytic core F(1)	cellular_component	10	4.24
3	GO:0045267	proton-transporting ATP synthase, catalytic core	cellular_component	9	5.399
3	GO:0030894	replisome	cellular_component	8	4.8
3	GO:0030428	cell septum	cellular_component	8	7.6
3	GO:0042763	immature spore	cellular_component	7	2.52
3	GO:0031252	leading edge	cellular_component	6	4.4
3	GO:0042597	periplasmic space	cellular_component	4	2.8
3	GO:0045178	basal part of cell	cellular_component	4	2.4
3	GO:0016471	hydrogen-translocating V-type ATPase complex	cellular_component	4	2.4
3	GO:0005784	translocon complex	cellular_component	3	1.799
3	GO:0019028	viral capsid	cellular_component	3	1.08
3	GO:0005662	DNA replication factor A complex	cellular_component	3	3
3	GO:0031205	Sec complex (sensu Eukaryota)	cellular_component	3	1.799
3	GO:0000243	commitment complex	cellular_component	3	3
3	GO:0043235	receptor complex	cellular_component	3	1.799
3	GO:0031105	septin complex	cellular_component	3	3
3	GO:0045177	apical part of cell	cellular_component	3	2.2
3	GO:0005663	DNA replication factor C complex	cellular_component	2	2
3	GO:0031431	Dbf4-dependent protein kinase complex	cellular_component	2	2
3	GO:0005658	alpha DNA polymerase:primase complex	cellular_component	2	2
3	GO:0005578	extracellular matrix (sensu Metazoa)	cellular_component	2	1.6
3	GO:0019031	viral envelope	cellular_component	1	1
3	GO:0031248	protein acetyltransferase complex	cellular_component	1	0.36
3	GO:0030897	HOPS complex	cellular_component	1	1
3	GO:0045281	succinate dehydrogenase complex	cellular_component	1	0.6
3	GO:0045283	fumarate reductase complex	cellular_component	1	0.6
3	GO:0045263	proton-transporting ATP synthase complex, coupling factor F(o)	cellular_component	1	1
3	GO:0030907	MBF transcription complex	cellular_component	1	1
4	GO:0043229	intracellular organelle	cellular_component	1041	366
4	GO:0005737	cytoplasm	cellular_component	921	653.5
4	GO:0005634	nucleus	cellular_component	592	411.6
4	GO:0030529	ribonucleoprotein complex	cellular_component	207	92.92
4	GO:0031090	organelle membrane	cellular_component	162	65.2
4	GO:0031224	intrinsic to membrane	cellular_component	146	70.6
4	GO:0005694	chromosome	cellular_component	111	60.72
4	GO:0005856	cytoskeleton	cellular_component	110	49.05
4	GO:0005886	plasma membrane	cellular_component	95	67.73
4	GO:0019866	inner membrane	cellular_component	73	34.02
4	GO:0012505	endomembrane system	cellular_component	72	30.55
4	GO:0000151	ubiquitin ligase complex	cellular_component	30	26.61
4	GO:0005625	soluble fraction	cellular_component	26	26
4	GO:0005618	cell wall	cellular_component	26	13.44
4	GO:0005624	membrane fraction	cellular_component	25	15.79
4	GO:0005935	bud neck	cellular_component	19	16.28
4	GO:0019867	outer membrane	cellular_component	18	11.36
4	GO:0019898	extrinsic to membrane	cellular_component	15	6.52
4	GO:0030880	RNA polymerase complex	cellular_component	13	13
4	GO:0045259	proton-transporting ATP synthase complex	cellular_component	13	5.544
4	GO:0008287	protein serine/threonine phosphatase complex	cellular_component	13	10.2
4	GO:0009295	nucleoid	cellular_component	11	6.6
4	GO:0005937	mating projection	cellular_component	9	5.8
4	GO:0043005	neuron projection	cellular_component	7	4.8
4	GO:0005628	prospore membrane	cellular_component	7	7
4	GO:0042764	prospore	cellular_component	7	4.2
4	GO:0000131	incipient bud site	cellular_component	7	7
4	GO:0048475	coated membrane	cellular_component	6	1.295
4	GO:0005934	bud tip	cellular_component	6	6
4	GO:0009320	phosphoribosylaminoimidazole carboxylase complex	cellular_component	5	5
4	GO:0030313	cell envelope	cellular_component	4	2.4
4	GO:0046728	viral capsid (sensu Retroviridae)	cellular_component	3	1.799
4	GO:0031206	Sec complex-associated translocon complex	cellular_component	3	3
4	GO:0000178	exosome (RNase complex)	cellular_component	3	2.8
4	GO:0009289	fimbrium	cellular_component	3	2.6
4	GO:0045271	respiratory chain complex I	cellular_component	3	1.799
4	GO:0030287	periplasmic space (sensu Fungi)	cellular_component	3	3
4	GO:0001726	ruffle	cellular_component	3	3
4	GO:0005785	signal recognition particle receptor complex	cellular_component	3	3
4	GO:0001411	hyphal tip	cellular_component	2	2.2
4	GO:0009925	basal plasma membrane	cellular_component	2	2
4	GO:0009331	glycerol-3-phosphate dehydrogenase complex	cellular_component	2	2
4	GO:0005956	protein kinase CK2 complex	cellular_component	2	2
4	GO:0005626	insoluble fraction	cellular_component	2	2
4	GO:0019861	flagellum	cellular_component	2	1.2
4	GO:0030175	filopodium	cellular_component	2	2
4	GO:0045180	basal cortex	cellular_component	2	2
4	GO:0045252	oxoglutarate dehydrogenase complex	cellular_component	2	1.2
4	GO:0000220	hydrogen-transporting ATPase V0 domain	cellular_component	2	2
4	GO:0045179	apical cortex	cellular_component	2	2
4	GO:0000221	hydrogen-transporting ATPase V1 domain	cellular_component	2	2
4	GO:0031143	pseudopodium	cellular_component	2	2
4	GO:0048476	Holliday junction resolvase complex	cellular_component	1	1
4	GO:0000307	cyclin-dependent protein kinase holoenzyme complex	cellular_component	1	1
4	GO:0030027	lamellipodium	cellular_component	1	1
4	GO:0045275	respiratory chain complex III	cellular_component	1	0.6
4	GO:0005604	basement membrane	cellular_component	1	1
4	GO:0045257	succinate dehydrogenase complex (ubiquinone)	cellular_component	1	0.6
4	GO:0042575	DNA polymerase complex	cellular_component	1	0.6
4	GO:0046821	extrachromosomal DNA	cellular_component	1	0.6
4	GO:0045273	respiratory chain complex II	cellular_component	1	0.36
4	GO:0017102	methionyl glutamyl tRNA synthetase complex	cellular_component	1	1
4	GO:0005958	DNA-dependent protein kinase complex	cellular_component	1	1
4	GO:0005749	respiratory chain complex II (sensu Eukaryota)	cellular_component	1	1
4	GO:0000935	barrier septum	cellular_component	1	1
5	GO:0043231	intracellular membrane-bound organelle	cellular_component	924	502.8
5	GO:0043232	intracellular non-membrane-bound organelle	cellular_component	399	163.2
5	GO:0005739	mitochondrion	cellular_component	278	200.2
5	GO:0005829	cytosol	cellular_component	215	127.8
5	GO:0005840	ribosome	cellular_component	149	80.46
5	GO:0016021	integral to membrane	cellular_component	146	117.6
5	GO:0005783	endoplasmic reticulum	cellular_component	116	79.43
5	GO:0005654	nucleoplasm	cellular_component	102	53.58
5	GO:0009536	plastid	cellular_component	81	73.38
5	GO:0016282	eukaryotic 43S preinitiation complex	cellular_component	78	47.19
5	GO:0005743	mitochondrial inner membrane	cellular_component	73	56.7
5	GO:0016283	eukaryotic 48S initiation complex	cellular_component	69	43.8
5	GO:0000228	nuclear chromosome	cellular_component	68	34.78
5	GO:0000785	chromatin	cellular_component	62	42.6
5	GO:0005681	spliceosome complex	cellular_component	58	35.4
5	GO:0015630	microtubule cytoskeleton	cellular_component	57	30.84
5	GO:0030532	small nuclear ribonucleoprotein complex	cellular_component	40	25.2
5	GO:0005938	cell cortex	cellular_component	39	19.06
5	GO:0042175	nuclear envelope-endoplasmic reticulum network	cellular_component	37	16.47
5	GO:0015629	actin cytoskeleton	cellular_component	37	22.92
5	GO:0031410	cytoplasmic vesicle	cellular_component	34	13.94
5	GO:0005794	Golgi apparatus	cellular_component	34	24.28
5	GO:0005773	vacuole	cellular_component	34	12.77
5	GO:0005815	microtubule organizing center	cellular_component	31	19.65
5	GO:0005635	nuclear membrane	cellular_component	27	20.43
5	GO:0009277	cell wall (sensu Fungi)	cellular_component	26	22.4
5	GO:0005768	endosome	cellular_component	22	17.36
5	GO:0005774	vacuolar membrane	cellular_component	16	11.24
5	GO:0000781	chromosome, telomeric region	cellular_component	16	12.16
5	GO:0031226	intrinsic to plasma membrane	cellular_component	16	9.6
5	GO:0005853	eukaryotic translation elongation factor 1 complex	cellular_component	15	15
5	GO:0000793	condensed chromosome	cellular_component	15	6.136
5	GO:0019897	extrinsic to plasma membrane	cellular_component	14	9.2
5	GO:0005657	replication fork	cellular_component	12	6.079
5	GO:0000346	transcription export complex	cellular_component	11	11
5	GO:0042598	vesicular fraction	cellular_component	10	6
5	GO:0008278	cohesin complex	cellular_component	10	9.6
5	GO:0000775	chromosome, pericentric region	cellular_component	10	7.375
5	GO:0043332	mating projection tip	cellular_component	8	8
5	GO:0000159	protein phosphatase type 2A complex	cellular_component	7	7
5	GO:0030424	axon	cellular_component	7	7
5	GO:0005811	lipid particle	cellular_component	7	7
5	GO:0005971	ribonucleoside-diphosphate reductase complex	cellular_component	6	6
5	GO:0042579	microbody	cellular_component	6	3.599
5	GO:0000803	sex chromosome	cellular_component	6	2.16
5	GO:0043292	contractile fiber	cellular_component	6	2.16
5	GO:0000109	nucleotide excision repair complex	cellular_component	6	3.599
5	GO:0045121	lipid raft	cellular_component	6	6
5	GO:0030117	membrane coat	cellular_component	6	2.16
5	GO:0000152	nuclear ubiquitin ligase complex	cellular_component	6	4
5	GO:0005700	polytene chromosome	cellular_component	5	3.8
5	GO:0045111	intermediate filament cytoskeleton	cellular_component	5	2.519
5	GO:0045254	pyruvate dehydrogenase complex	cellular_component	5	3
5	GO:0030904	retromer complex	cellular_component	5	5
5	GO:0031300	intrinsic to organelle membrane	cellular_component	5	1.799
5	GO:0030054	cell junction	cellular_component	5	1.223
5	GO:0009898	internal side of plasma membrane	cellular_component	5	3.4
5	GO:0000142	contractile ring (sensu Saccharomyces)	cellular_component	5	3.8
5	GO:0016327	apicolateral plasma membrane	cellular_component	4	0.863
5	GO:0030530	heterogeneous nuclear ribonucleoprotein complex	cellular_component	4	4
5	GO:0009279	outer membrane (sensu Gram-negative Bacteria)	cellular_component	4	4
5	GO:0031519	PcG protein complex	cellular_component	4	2.4
5	GO:0000139	Golgi membrane	cellular_component	4	4
5	GO:0019717	synaptosome	cellular_component	3	3
5	GO:0000300	peripheral to membrane of membrane fraction	cellular_component	3	3
5	GO:0005851	eukaryotic translation initiation factor 2B complex	cellular_component	3	3
5	GO:0005844	polysome	cellular_component	3	3
5	GO:0016281	eukaryotic translation initiation factor 4F complex	cellular_component	3	3
5	GO:0048500	signal recognition particle	cellular_component	3	1.799
5	GO:0019013	viral nucleocapsid	cellular_component	3	3
5	GO:0030684	preribosome	cellular_component	3	1.008
5	GO:0009346	citrate lyase complex	cellular_component	3	3
5	GO:0008180	signalosome complex	cellular_component	2	2
5	GO:0031391	Elg1 RFC-like complex	cellular_component	2	2
5	GO:0016323	basolateral plasma membrane	cellular_component	2	1.2
5	GO:0045239	tricarboxylic acid cycle enzyme complex	cellular_component	2	1.2
5	GO:0000176	nuclear exosome (RNase complex)	cellular_component	2	2
5	GO:0000214	tRNA-intron endonuclease complex	cellular_component	2	2
5	GO:0018444	translation release factor complex	cellular_component	2	2
5	GO:0031461	cullin-RING ubiquitin ligase complex	cellular_component	2	0.96
5	GO:0031389	Rad17 RFC-like complex	cellular_component	2	2
5	GO:0000932	cytoplasmic mRNA processing body	cellular_component	2	2
5	GO:0031390	Ctf18 RFC-like complex	cellular_component	2	2
5	GO:0030689	Noc complex	cellular_component	2	1.799
5	GO:0031562	hyphal tip polarisome	cellular_component	1	1
5	GO:0009288	flagellum (sensu Bacteria)	cellular_component	1	1
5	GO:0031521	spitzenkorper	cellular_component	1	1
5	GO:0016528	sarcoplasm	cellular_component	1	0.6
5	GO:0016363	nuclear matrix	cellular_component	1	1
5	GO:0031523	Myb complex	cellular_component	1	1
5	GO:0000299	integral to membrane of membrane fraction	cellular_component	1	1
5	GO:0031414	N-terminal protein acetyltransferase complex	cellular_component	1	0.6
5	GO:0008622	epsilon DNA polymerase complex	cellular_component	1	1
5	GO:0009317	acetyl-CoA carboxylase complex	cellular_component	1	0.6
5	GO:0009434	flagellum (sensu Eukaryota)	cellular_component	1	1
5	GO:0005727	extrachromosomal circular DNA	cellular_component	1	1
5	GO:0048471	perinuclear region	cellular_component	1	1
5	GO:0042383	sarcolemma	cellular_component	1	1
5	GO:0009417	fimbrin	cellular_component	1	1
5	GO:0005846	snRNA cap binding complex	cellular_component	1	1
5	GO:0030425	dendrite	cellular_component	1	1
5	GO:0016028	rhabdomere	cellular_component	1	1
5	GO:0000148	1,3-beta-glucan synthase complex	cellular_component	1	1
5	GO:0000177	cytoplasmic exosome (RNase complex)	cellular_component	1	1
5	GO:0005793	ER-Golgi intermediate compartment	cellular_component	1	1
6	GO:0005830	cytosolic ribosome (sensu Eukaryota)	cellular_component	108	68.39
6	GO:0005740	mitochondrial membrane	cellular_component	85	40.98
6	GO:0005730	nucleolus	cellular_component	75	63.8
6	GO:0015935	small ribosomal subunit	cellular_component	74	52.64
6	GO:0005759	mitochondrial matrix	cellular_component	51	39.8
6	GO:0005667	transcription factor complex	cellular_component	47	34.92
6	GO:0000790	nuclear chromatin	cellular_component	40	31.01
6	GO:0015934	large ribosomal subunit	cellular_component	38	25.19
6	GO:0005684	major (U2-dependent) spliceosome	cellular_component	35	21
6	GO:0005789	endoplasmic reticulum membrane	cellular_component	35	24.12
6	GO:0016023	cytoplasmic membrane-bound vesicle	cellular_component	34	23.23
6	GO:0005819	spindle	cellular_component	34	17.87
6	GO:0000323	lytic vacuole	cellular_component	27	13.32
6	GO:0016591	DNA-directed RNA polymerase II, holoenzyme	cellular_component	23	14.2
6	GO:0005874	microtubule	cellular_component	23	23.96
6	GO:0000502	proteasome complex (sensu Eukaryota)	cellular_component	22	11.6
6	GO:0000313	organellar ribosome	cellular_component	21	11.04
6	GO:0005813	centrosome	cellular_component	20	17.2
6	GO:0016469	proton-transporting two-sector ATPase complex	cellular_component	17	6.606
6	GO:0030445	yeast-form cell wall	cellular_component	17	17
6	GO:0000322	storage vacuole	cellular_component	16	6.96
6	GO:0005887	integral to plasma membrane	cellular_component	16	16
6	GO:0005832	chaperonin-containing T-complex	cellular_component	16	16
6	GO:0005795	Golgi stack	cellular_component	15	14.6
6	GO:0009532	plastid stroma	cellular_component	15	5.639
6	GO:0030863	cortical cytoskeleton	cellular_component	15	5.399
6	GO:0030864	cortical actin cytoskeleton	cellular_component	15	9
6	GO:0000786	nucleosome	cellular_component	15	13
6	GO:0005816	spindle pole body	cellular_component	14	14.8
6	GO:0016585	chromatin remodeling complex	cellular_component	14	10.39
6	GO:0005849	mRNA cleavage factor complex	cellular_component	14	9.2
6	GO:0005788	endoplasmic reticulum lumen	cellular_component	14	14
6	GO:0051285	cell cortex of cell tip	cellular_component	13	13
6	GO:0000794	condensed nuclear chromosome	cellular_component	13	7.959
6	GO:0005884	actin filament	cellular_component	12	12
6	GO:0000792	heterochromatin	cellular_component	12	5.016
6	GO:0005875	microtubule associated complex	cellular_component	12	8.8
6	GO:0000329	vacuolar membrane (sensu Fungi)	cellular_component	11	11
6	GO:0009507	chloroplast	cellular_component	11	10.6
6	GO:0046930	pore complex	cellular_component	10	5.52
6	GO:0005643	nuclear pore	cellular_component	10	9.2
6	GO:0005792	microsome	cellular_component	10	10
6	GO:0000796	condensin complex	cellular_component	9	5.399
6	GO:0000784	nuclear chromosome, telomeric region	cellular_component	9	8.6
6	GO:0005834	heterotrimeric G-protein complex	cellular_component	8	8
6	GO:0005852	eukaryotic translation initiation factor 3 complex	cellular_component	8	8
6	GO:0030446	hyphal cell wall	cellular_component	7	7
6	GO:0005744	mitochondrial inner membrane presequence translocase complex	cellular_component	7	4.6
6	GO:0016604	nuclear body	cellular_component	7	3.719
6	GO:0010008	endosome membrane	cellular_component	7	6.6
6	GO:0005826	contractile ring	cellular_component	6	1.968
6	GO:0005791	rough endoplasmic reticulum	cellular_component	6	1.728
6	GO:0005777	peroxisome	cellular_component	6	6
6	GO:0030480	contractile ring (sensu Fungi)	cellular_component	6	3.28
6	GO:0000805	X chromosome	cellular_component	6	3.599
6	GO:0005850	eukaryotic translation initiation factor 2 complex	cellular_component	6	6
6	GO:0030016	myofibril	cellular_component	6	3.599
6	GO:0008023	transcription elongation factor complex	cellular_component	5	4.6
6	GO:0005758	mitochondrial intermembrane space	cellular_component	5	4.6
6	GO:0005882	intermediate filament	cellular_component	5	4.2
6	GO:0031301	integral to organelle membrane	cellular_component	5	3
6	GO:0005746	mitochondrial electron transport chain	cellular_component	5	3
6	GO:0005885	Arp2/3 protein complex	cellular_component	5	5
6	GO:0005770	late endosome	cellular_component	5	5
6	GO:0000776	kinetochore	cellular_component	4	2.96
6	GO:0005912	adherens junction	cellular_component	4	1.44
6	GO:0030055	cell-matrix junction	cellular_component	4	1.44
6	GO:0031234	extrinsic to internal side of plasma membrane	cellular_component	4	4
6	GO:0005666	DNA-directed RNA polymerase III complex	cellular_component	4	4
6	GO:0005769	early endosome	cellular_component	4	4
6	GO:0005680	anaphase-promoting complex	cellular_component	4	4
6	GO:0005940	septin ring	cellular_component	4	3.88
6	GO:0035097	histone methyltransferase complex	cellular_component	4	2.4
6	GO:0000112	nucleotide excision repair factor 3 complex	cellular_component	4	4
6	GO:0005637	nuclear inner membrane	cellular_component	4	3.2
6	GO:0000144	septin ring (sensu Saccharomyces)	cellular_component	3	3
6	GO:0042721	mitochondrial inner membrane protein insertion complex	cellular_component	3	3
6	GO:0035101	FACT complex	cellular_component	3	3
6	GO:0005704	polytene chromosome band	cellular_component	3	3
6	GO:0005786	signal recognition particle (sensu Eukaryota)	cellular_component	3	3
6	GO:0031097	medial ring	cellular_component	3	3
6	GO:0005869	dynactin complex	cellular_component	2	2
6	GO:0005652	nuclear lamina	cellular_component	2	1.2
6	GO:0042555	MCM complex	cellular_component	2	2
6	GO:0046540	U4/U6 x U5 tri-snRNP complex	cellular_component	2	2
6	GO:0005656	pre-replicative complex	cellular_component	2	2
6	GO:0016459	myosin	cellular_component	2	1.6
6	GO:0042709	succinate-CoA ligase complex	cellular_component	2	2
6	GO:0016465	chaperonin ATPase complex	cellular_component	2	2
6	GO:0017053	transcriptional repressor complex	cellular_component	2	2
6	GO:0005689	minor (U12-dependent) spliceosome complex	cellular_component	2	1.2
6	GO:0019005	SCF ubiquitin ligase complex	cellular_component	2	1.6
6	GO:0000779	condensed chromosome, pericentric region	cellular_component	2	0.96
6	GO:0030482	actin cable	cellular_component	1	1
6	GO:0005818	aster	cellular_component	1	0.6
6	GO:0017119	Golgi transport complex	cellular_component	1	1
6	GO:0043224	nuclear SCF ubiquitin ligase complex	cellular_component	1	1
6	GO:0000923	equatorial microtubule organizing center	cellular_component	1	1
6	GO:0016529	sarcoplasmic reticulum	cellular_component	1	1
6	GO:0031416	NatB complex	cellular_component	1	1
6	GO:0008290	F-actin capping protein complex	cellular_component	1	1
6	GO:0000811	GINS complex	cellular_component	1	1
6	GO:0000113	nucleotide excision repair factor 4 complex	cellular_component	1	1
6	GO:0005721	centric heterochromatin	cellular_component	1	1
6	GO:0030892	mitotic cohesin complex	cellular_component	1	1
6	GO:0000930	gamma-tubulin complex	cellular_component	1	0.36
6	GO:0005802	Golgi trans face	cellular_component	1	1
6	GO:0009705	vacuolar membrane (sensu Magnoliophyta)	cellular_component	1	1
6	GO:0000325	vacuole (sensu Magnoliophyta)	cellular_component	1	0.6
6	GO:0000145	exocyst	cellular_component	1	1
6	GO:0000133	polarisome	cellular_component	1	0.6
6	GO:0009343	biotin carboxylase complex	cellular_component	1	1
6	GO:0005911	intercellular junction	cellular_component	1	0.6
6	GO:0030691	Noc2p-Noc3p complex	cellular_component	1	1
7	GO:0005843	cytosolic small ribosomal subunit (sensu Eukaryota)	cellular_component	63	63
7	GO:0005842	cytosolic large ribosomal subunit (sensu Eukaryota)	cellular_component	36	36
7	GO:0000922	spindle pole	cellular_component	31	21
7	GO:0005685	snRNP U1	cellular_component	30	30
7	GO:0000123	histone acetyltransferase complex	cellular_component	16	13.59
7	GO:0000324	vacuole (sensu Fungi)	cellular_component	16	11.6
7	GO:0005732	small nucleolar ribonucleoprotein complex	cellular_component	15	15
7	GO:0005761	mitochondrial ribosome	cellular_component	15	10
7	GO:0030479	actin cortical patch	cellular_component	15	15
7	GO:0009547	plastid ribosome	cellular_component	14	8.399
7	GO:0045255	hydrogen-translocating F-type ATPase complex	cellular_component	13	4.343
7	GO:0005720	nuclear heterochromatin	cellular_component	12	8.36
7	GO:0005847	mRNA cleavage and polyadenylation specificity factor complex	cellular_component	12	12
7	GO:0005741	mitochondrial outer membrane	cellular_component	12	11.6
7	GO:0000314	organellar small ribosomal subunit	cellular_component	12	11.39
7	GO:0005764	lysosome	cellular_component	11	10.6
7	GO:0005669	transcription factor TFIID complex	cellular_component	11	11
7	GO:0042645	mitochondrial nucleoid	cellular_component	11	11
7	GO:0005838	proteasome regulatory particle (sensu Eukaryota)	cellular_component	11	7
7	GO:0030135	coated vesicle	cellular_component	11	4.8
7	GO:0000799	nuclear condensin complex	cellular_component	9	9
7	GO:0000315	organellar large ribosomal subunit	cellular_component	9	6
7	GO:0000126	transcription factor TFIIIB complex	cellular_component	9	9
7	GO:0005736	DNA-directed RNA polymerase I complex	cellular_component	7	7
7	GO:0030014	CCR4-NOT complex	cellular_component	6	4
7	GO:0043034	costamere	cellular_component	6	6
7	GO:0001405	presequence translocase-associated import motor	cellular_component	6	6
7	GO:0005876	spindle microtubule	cellular_component	6	5.6
7	GO:0005839	proteasome core complex (sensu Eukaryota)	cellular_component	6	4
7	GO:0000120	RNA polymerase I transcription factor complex	cellular_component	6	6
7	GO:0030867	rough endoplasmic reticulum membrane	cellular_component	6	2.88
7	GO:0005967	pyruvate dehydrogenase complex (sensu Eukaryota)	cellular_component	5	5
7	GO:0005675	transcription factor TFIIH complex	cellular_component	5	5
7	GO:0000242	pericentriolar material	cellular_component	5	5
7	GO:0031227	intrinsic to endoplasmic reticulum membrane	cellular_component	5	3
7	GO:0030176	integral to endoplasmic reticulum membrane	cellular_component	5	5
7	GO:0008250	oligosaccharyl transferase complex	cellular_component	5	5
7	GO:0000788	nuclear nucleosome	cellular_component	5	5
7	GO:0016607	nuclear speck	cellular_component	5	4.2
7	GO:0005798	Golgi vesicle	cellular_component	4	3.2
7	GO:0035098	ESC/E(Z) complex	cellular_component	4	4
7	GO:0005665	DNA-directed RNA polymerase II, core complex	cellular_component	4	4
7	GO:0000812	SWR1 complex	cellular_component	4	4
7	GO:0005924	cell-substrate adherens junction	cellular_component	4	2.4
7	GO:0005747	respiratory chain complex I (sensu Eukaryota)	cellular_component	3	3
7	GO:0030139	endocytic vesicle	cellular_component	3	2.6
7	GO:0042765	GPI-anchor transamidase complex	cellular_component	3	3
7	GO:0000118	histone deacetylase complex	cellular_component	3	2.6
7	GO:0017059	serine C-palmitoyltransferase complex	cellular_component	3	3
7	GO:0005686	snRNP U2	cellular_component	3	3
7	GO:0030286	dynein complex	cellular_component	3	3
7	GO:0005871	kinesin complex	cellular_component	3	3
7	GO:0030481	septin ring (sensu Fungi)	cellular_component	3	1.799
7	GO:0030685	nucleolar preribosome	cellular_component	3	1.68
7	GO:0005880	nuclear microtubule	cellular_component	2	2
7	GO:0005677	chromatin silencing complex	cellular_component	2	1.2
7	GO:0009353	oxoglutarate dehydrogenase complex (sensu Eukaryota)	cellular_component	2	2
7	GO:0045298	tubulin	cellular_component	2	2
7	GO:0005881	cytoplasmic microtubule	cellular_component	2	2
7	GO:0005682	snRNP U5	cellular_component	2	2
7	GO:0005678	chromatin assembly complex	cellular_component	2	1.2
7	GO:0031080	Nup107-160 complex	cellular_component	2	2
7	GO:0000777	condensed chromosome kinetochore	cellular_component	2	1.6
7	GO:0015030	Cajal body	cellular_component	2	2
7	GO:0030133	transport vesicle	cellular_component	2	1.2
7	GO:0005638	lamin filament	cellular_component	2	2
7	GO:0000235	astral microtubule	cellular_component	1	1
7	GO:0031011	INO80 complex	cellular_component	1	1
7	GO:0005824	outer plaque of spindle pole body	cellular_component	1	1
7	GO:0000815	ESCRT III complex	cellular_component	1	1
7	GO:0009570	chloroplast stroma	cellular_component	1	1
7	GO:0046581	intercellular canaliculus	cellular_component	1	1
7	GO:0016593	Cdc73/Paf1 complex	cellular_component	1	1
7	GO:0005814	centriole	cellular_component	1	1
7	GO:0031010	ISWI complex	cellular_component	1	0.6
7	GO:0042719	mitochondrial intermembrane space protein transporter complex	cellular_component	1	1
7	GO:0008275	gamma-tubulin small complex	cellular_component	1	0.6
7	GO:0008623	chromatin accessibility complex	cellular_component	1	1
7	GO:0030141	secretory granule	cellular_component	1	1
7	GO:0008352	katanin	cellular_component	1	1
7	GO:0005822	inner plaque of spindle pole body	cellular_component	1	1
7	GO:0005672	transcription factor TFIIA complex	cellular_component	1	1
7	GO:0016460	myosin II	cellular_component	1	1
7	GO:0005797	Golgi medial cisterna	cellular_component	1	1
7	GO:0005724	nuclear telomeric heterochromatin	cellular_component	1	1
7	GO:0005750	respiratory chain complex III (sensu Eukaryota)	cellular_component	1	1
7	GO:0000795	synaptonemal complex	cellular_component	1	1
7	GO:0030998	linear element	cellular_component	1	1
7	GO:0000780	condensed nuclear chromosome, pericentric region	cellular_component	1	0.6
8	GO:0005753	proton-transporting ATP synthase complex (sensu Eukaryota)	cellular_component	13	7.24
8	GO:0005763	mitochondrial small ribosomal subunit	cellular_component	10	10
8	GO:0030138	COPII-coated vesicle	cellular_component	9	5.8
8	GO:0000312	plastid small ribosomal subunit	cellular_component	9	9
8	GO:0035267	TIP60 histone acetyltransferase complex	cellular_component	8	8
8	GO:0008540	proteasome regulatory particle, base subcomplex (sensu Eukaryota)	cellular_component	7	7
8	GO:0043189	H4/H2A histone acetyltransferase complex	cellular_component	6	6
8	GO:0030120	vesicle coat	cellular_component	6	3.599
8	GO:0001739	sex chromatin	cellular_component	6	3.599
8	GO:0000311	plastid large ribosomal subunit	cellular_component	5	5
8	GO:0030015	CCR4-NOT core complex	cellular_component	5	5
8	GO:0005762	mitochondrial large ribosomal subunit	cellular_component	5	5
8	GO:0005925	focal adhesion	cellular_component	4	4
8	GO:0046695	SLIK (SAGA-like) complex	cellular_component	4	4
8	GO:0008541	proteasome regulatory particle, lid subcomplex (sensu Eukaryota)	cellular_component	3	3
8	GO:0005827	polar microtubule	cellular_component	3	3
8	GO:0019774	proteasome core complex, beta-subunit complex (sensu Eukaryota)	cellular_component	3	3
8	GO:0030686	90S preribosome	cellular_component	3	2.2
8	GO:0016590	ACF complex	cellular_component	2	2
8	GO:0000124	SAGA complex	cellular_component	2	2
8	GO:0035062	omega speckle	cellular_component	2	2
8	GO:0030869	RENT complex	cellular_component	2	2
8	GO:0019773	proteasome core complex, alpha-subunit complex (sensu Eukaryota)	cellular_component	2	2
8	GO:0030136	clathrin-coated vesicle	cellular_component	2	1.2
8	GO:0005828	kinetochore microtubule	cellular_component	2	2
8	GO:0016589	NURF complex	cellular_component	1	1
8	GO:0001669	acrosome	cellular_component	1	1
8	GO:0016581	NuRD complex	cellular_component	1	1
8	GO:0001401	mitochondrial sorting and assembly machinery complex	cellular_component	1	1
8	GO:0045335	phagocytic vesicle	cellular_component	1	1
8	GO:0030687	nucleolar preribosome, large subunit precursor	cellular_component	1	1.2
8	GO:0030137	COPI-coated vesicle	cellular_component	1	1
8	GO:0000778	condensed nuclear chromosome kinetochore	cellular_component	1	1
8	GO:0000125	PCAF complex	cellular_component	1	1
8	GO:0030688	nucleolar preribosome, small subunit precursor	cellular_component	1	0.6
8	GO:0000928	gamma-tubulin complex (sensu Saccharomyces)	cellular_component	1	1
9	GO:0000275	proton-transporting ATP synthase complex, catalytic core F(1) (sensu Eukaryota)	cellular_component	9	5.399
9	GO:0030127	COPII vesicle coat	cellular_component	6	6
9	GO:0001740	Barr body	cellular_component	6	6
9	GO:0030134	ER-Golgi transport vesicle	cellular_component	2	2
9	GO:0008021	synaptic vesicle	cellular_component	2	2
9	GO:0030692	Noc4p-Nop14p complex	cellular_component	1	1
9	GO:0030690	Noc1p-Noc2p complex	cellular_component	1	1
10	GO:0005754	proton-transporting ATP synthase, catalytic core (sensu Eukaryota)	cellular_component	9	9
